# Supplementary material
Source: PubMed Central journal article supplement (PMC4139174)
Supplement: ic5006083_si_001.pdf [file ic5006083_si_001.pdf]

# **Seven-Coordinate Co<sup>II</sup>, Fe<sup>II</sup> and Six-Coordinate Ni<sup>II</sup> Amide-Appended Macrocyclic Complexes as ParaCEST Agents in Biological Media**

Abiola O. Olatunde,<sup>†</sup> Jordan M. Cox,<sup>†</sup> Michael D. Daddario,<sup>§</sup> Joseph A. Sperryak,<sup>§</sup> Jason B. Benedict,<sup>†</sup> Janet R. Morrow<sup>\*,†</sup>

<sup>†</sup> Department of Chemistry, University at Buffalo, State University of New York Amherst, New York 14260

<sup>§</sup> Department of Cell Stress Biology, Roswell Park Cancer Institute, Buffalo, New York 14263

### **Additional experimental methods**

The mass susceptibility of solute ( $\chi_g$ ) is typically calculated by obtaining the observed frequency shift of the reference ( $\Delta f$ ) in Hz, the spectrometer frequency ( $f$ ) in Hz, the mass of the substance per  $\text{cm}^3$  of solution ( $m$ ), and the mass susceptibility of solvent  $\text{D}_2\text{O}$  ( $\chi_0 = -0.6466 \times 10^{-6} \text{ cm}^3/\text{g}$ ).<sup>1</sup> The last term is neglected here due to the minimal contribution to mass susceptibility of solute. The molar susceptibility ( $\chi_m$ ) is the product of  $\chi_g$  multiplied by the molecular weight of the complex.<sup>2,3</sup>

$$\text{Eq. S1 } \chi_g = (-3\Delta f)/(4\pi f m) + \chi_0 + [\chi_0 (d_0 - d_s)]/m$$

$$\text{Eq. S2 } \mu_{\text{eff}} = 2.84 (\chi_m T)^{1/2}$$

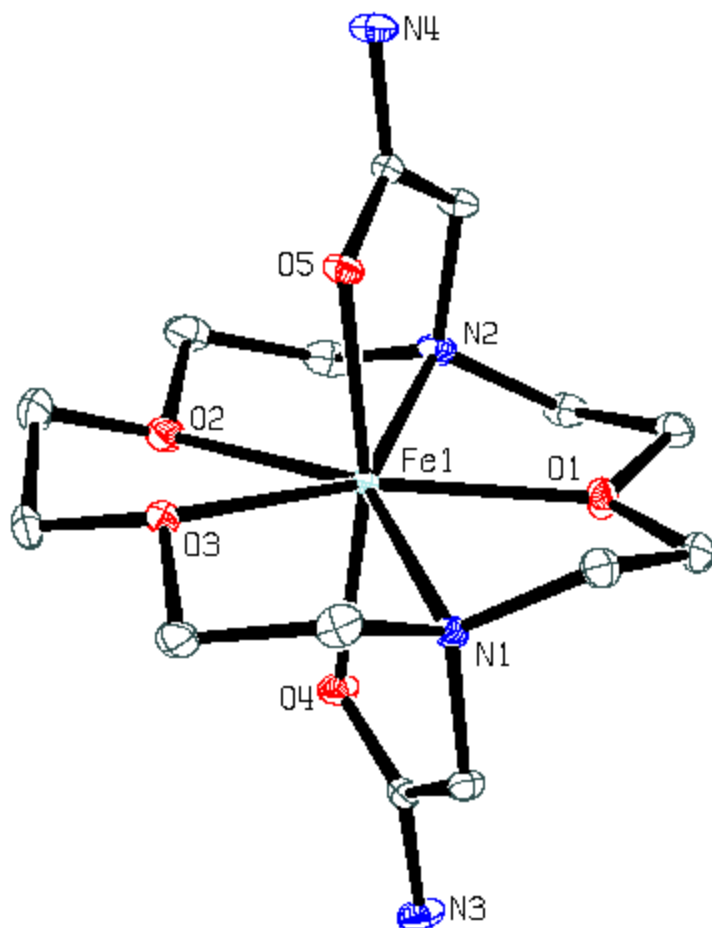

**Figure S1.** Ortep diagram (50% ellipsoids) of [Fe(L)](CF<sub>3</sub>SO<sub>3</sub>)<sub>2</sub>. For clarity, the H atoms, solvent, and counter ions were omitted in the structure.

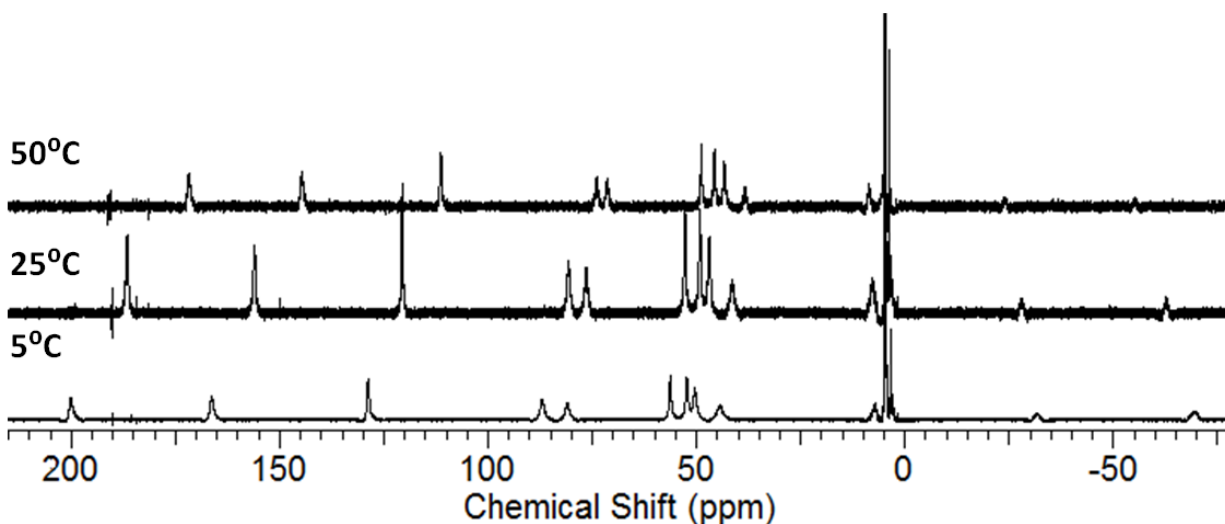

**Figure S2.**  $^1\text{H}$  NMR spectra of 10 mM  $[\text{Fe}(\text{L})]^{2+}$  at varying temperatures in  $\text{D}_2\text{O}$ .

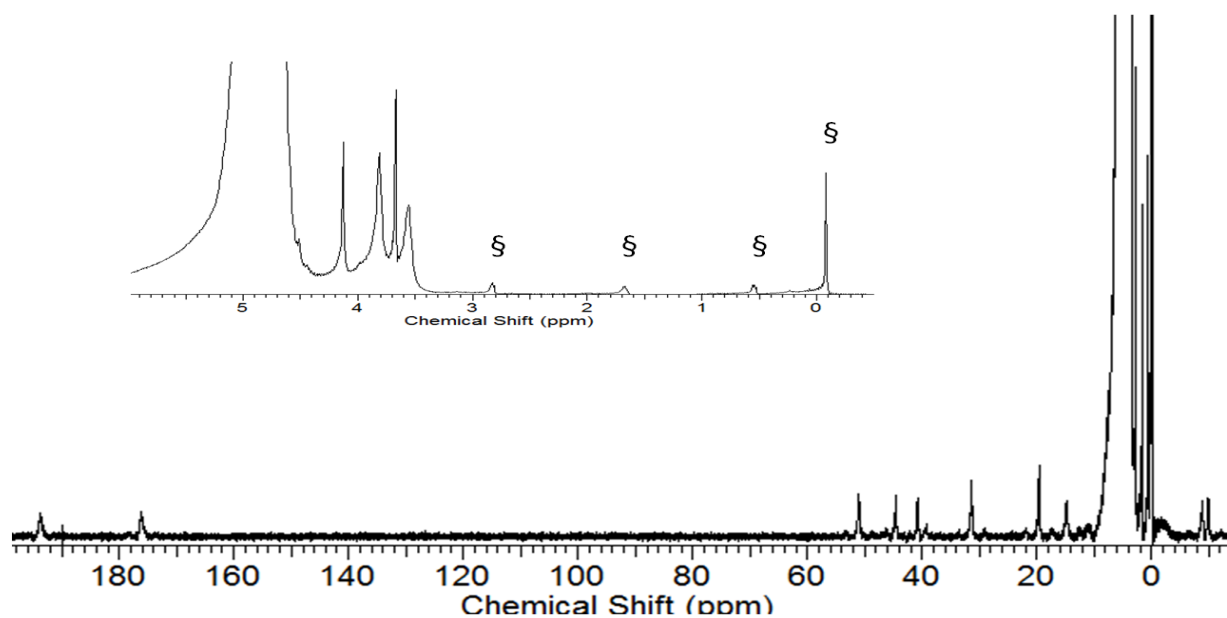

**Figure S3.**  $^1\text{H}$  NMR spectra of 9.8 mM  $[\text{Ni}(\text{L})]^{2+}$ , 100 mM NaCl, 3 mM 3-(trimethylsilyl)-1-propanesulfonic acid sodium salt (§) at pD 4.0 after 12 hours of incubation at 37 °C. Peaks at 3.5- 4.0 ppm represent newly formed free ligand in the acidic solution. The percent dissociation of  $[\text{Ni}(\text{L})]^{2+}$  was calculated by integrating peaks paramagnetic peaks at 176 and 193 ppm versus standard. Inset represents diamagnetic region.

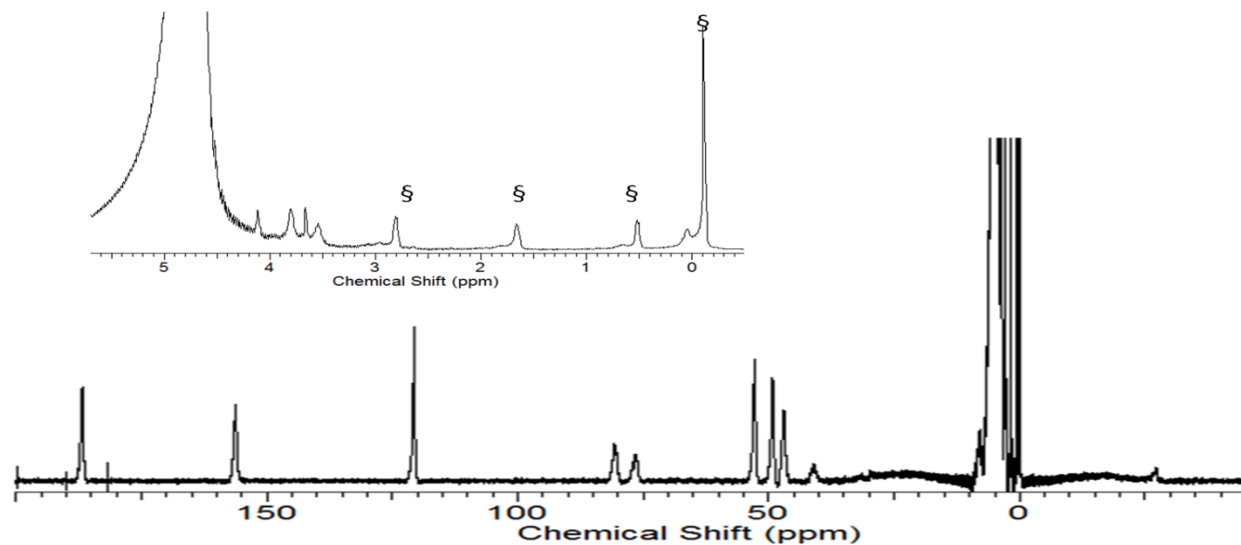

**Figure S4.**  $^1\text{H}$  NMR spectra of 9.9 mM  $[\text{Fe}(\text{L})]^{2+}$ , 100 mM NaCl, 5 mM 3-(trimethylsilyl)-1-propanesulfonic acid sodium salt (§) at pD 4.3 after 12 hours of incubation at  $37^\circ\text{C}$ . Inset represents diamagnetic region. Peaks at 3.5- 4.0 ppm represent newly formed free ligand in acidic solution.

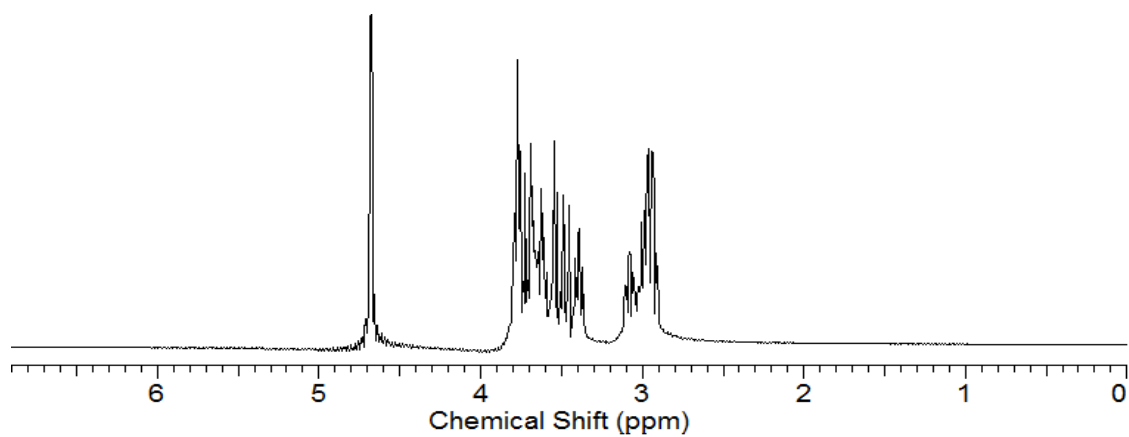

**Figure S5.**  $^1\text{H}$  NMR spectrum of  $[\text{Zn}(\text{L})]^{2+}$  complex in  $\text{D}_2\text{O}$

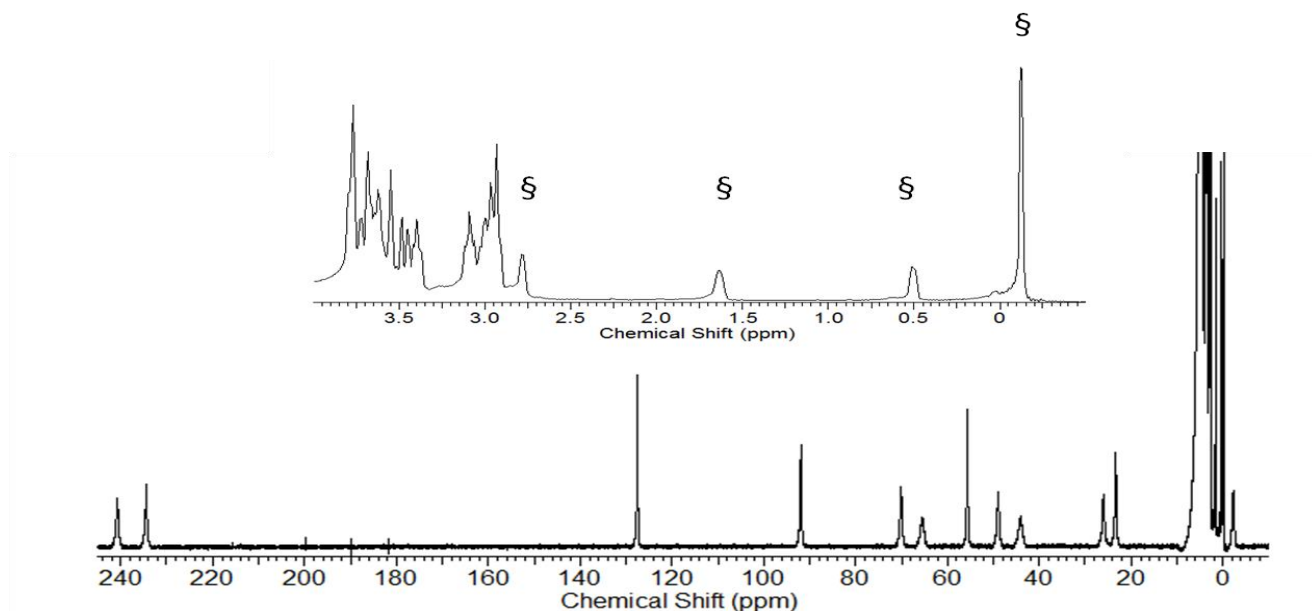

**Figure S6.** <sup>1</sup>H NMR spectra of 10 mM [Co(L)]<sup>2+</sup>, 100 mM NaCl, 5mM 3-(trimethylsilyl)-1-propanesulfonic acid sodium salt (§) incubated with 10 mM ZnCl<sub>2</sub> at pD 7.0 after 12 hours of incubation at 37°C. The percent dissociation of [Co(L)]<sup>2+</sup> was calculated by integrating peaks of the peaks at 234 and 241 ppm versus standard. Inset represents diamagnetic region.

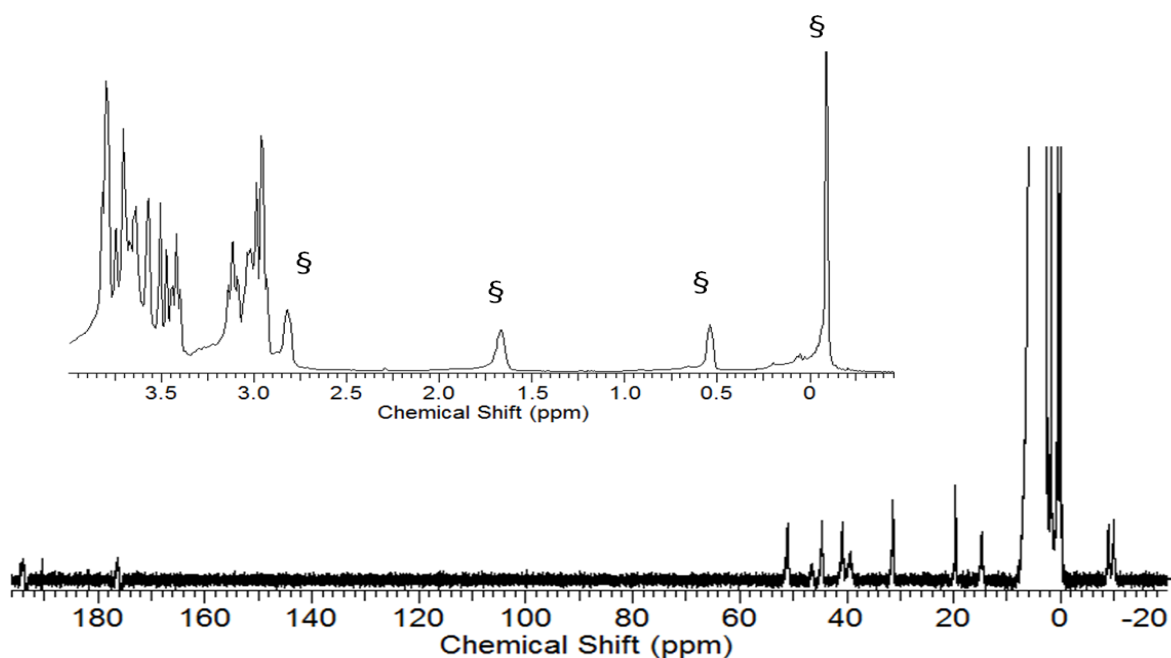

**Figure S7.** <sup>1</sup>H NMR spectra of 10 mM [Ni(L)]<sup>2+</sup>, 100 mM NaCl, 5 mM 3-(trimethylsilyl)-1-propanesulfonic acid sodium salt (§), and 10 mM ZnCl<sub>2</sub> at pD 7.0 after 12 hours of incubation at 37°C. The percent dissociation of [Ni(L)]<sup>2+</sup> was calculated by integrating peaks of the peaks at 15 and 20 ppm versus standard. Inset represents diamagnetic region.

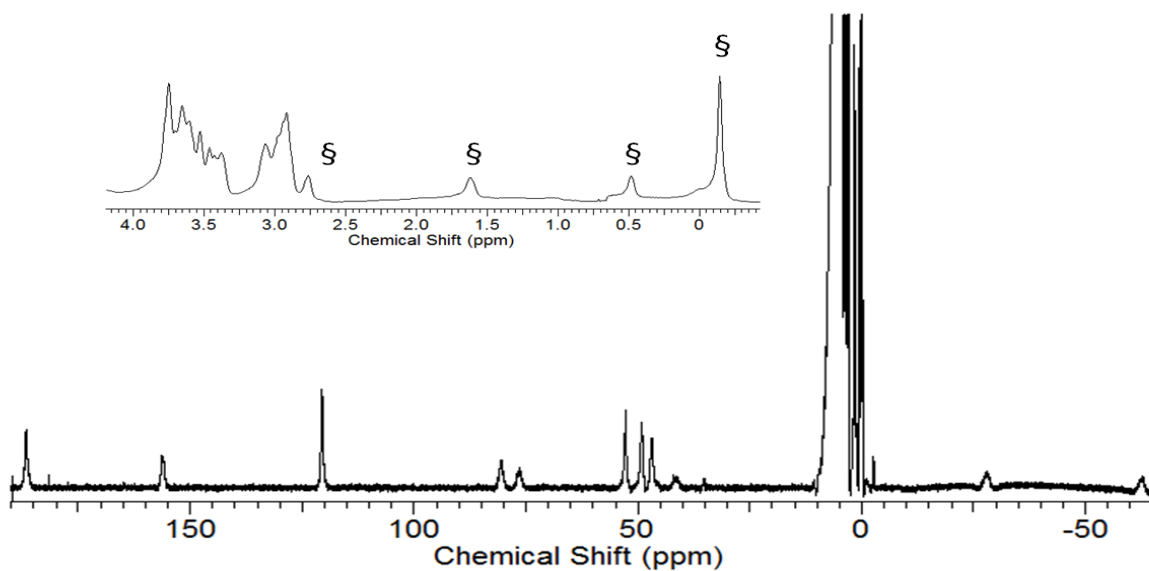

**Figure S8.**  $^1\text{H}$  NMR spectra of 10 mM  $[\text{Fe}(\text{L})]^{2+}$ , 100 mM NaCl, 5 mM 3-(trimethylsilyl)-1-propanesulfonic acid sodium salt (§), incubated with 10 mM  $\text{ZnCl}_2$  at pH 7.0 after 12 hours of incubation at  $37^\circ\text{C}$ . Inset represents diamagnetic region.

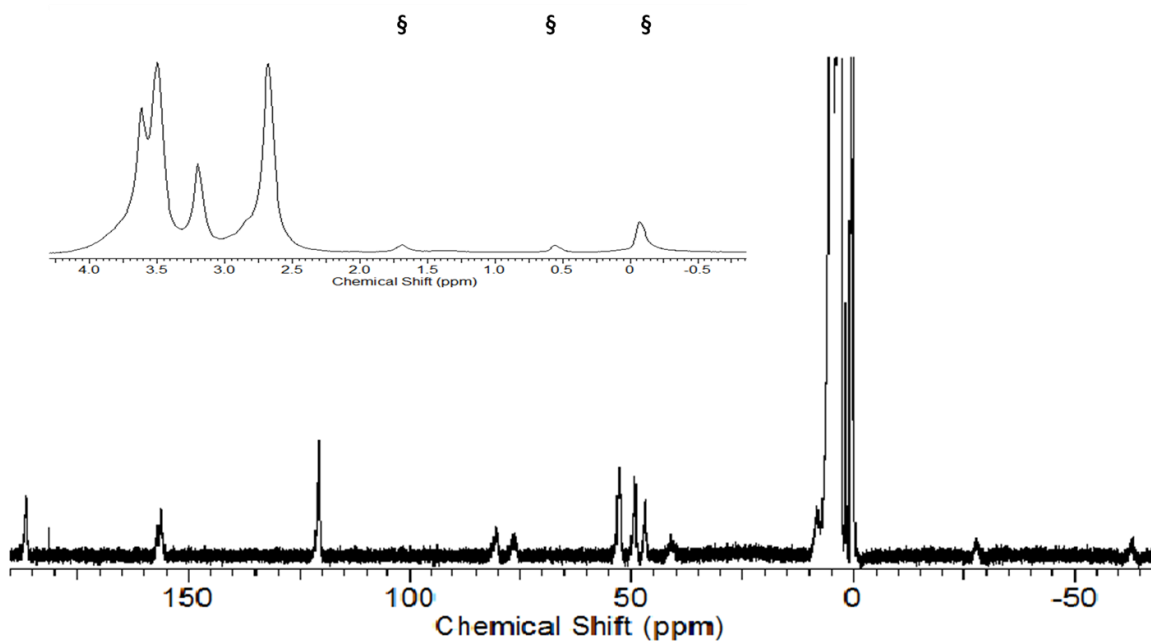

**Figure S9.**  $^1\text{H}$  NMR spectra of 10 mM  $[\text{Fe}(\text{L})]^{2+}$ , 100 mM NaCl, 0.4 mM  $\text{Na}_2\text{HPO}_4$ , 25 mM  $\text{K}_2\text{CO}_3$ , after 12 hours of incubation at  $37^\circ\text{C}$ . The 3 mM 3-(trimethylsilyl)-1-propanesulfonic acid sodium (§) salt was added as a reference. Initial spectrum showed no evidence for free ligand in solution. Inset represents diamagnetic region

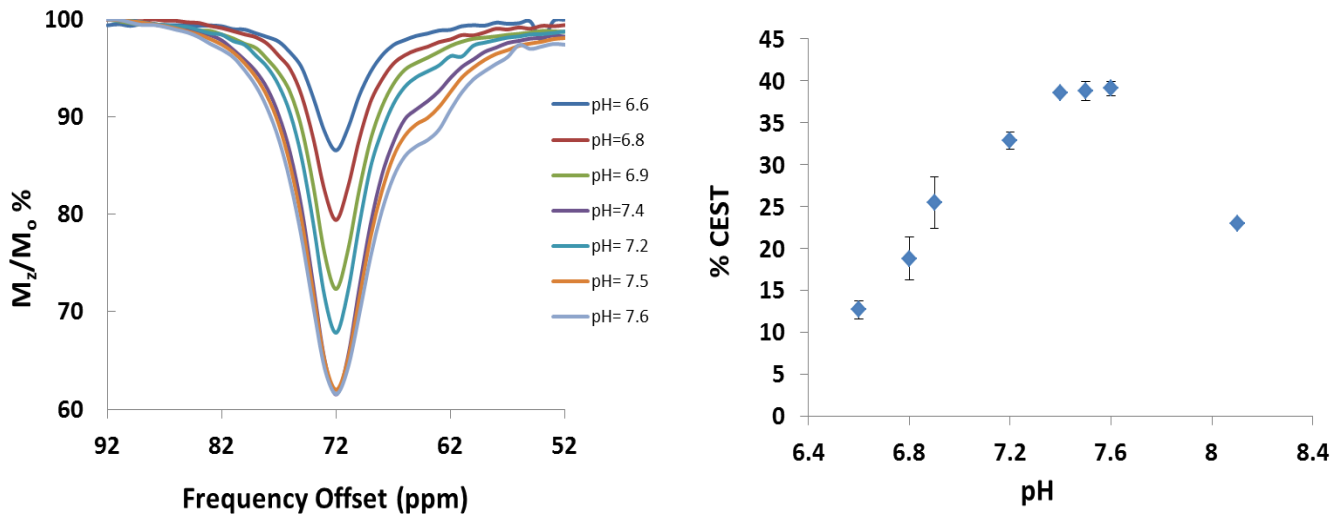

**Figure S10.** pH dependent CEST recorded at 11.7 T of solutions containing 10 mM  $[\text{Ni}(\text{L})]^{2+}$ , 20 mM buffer pH 6.6-7.6, and 100 mM NaCl (left). Plot of the CEST effect for 10 mM  $[\text{Ni}(\text{L})]^{2+}$ , 20 mM buffer pH 6.6-8.1 and 100 mM NaCl (right). RF presaturation pulse applied for 2 seconds  $B_1 = 24 \mu\text{T}$  at 37 °C.

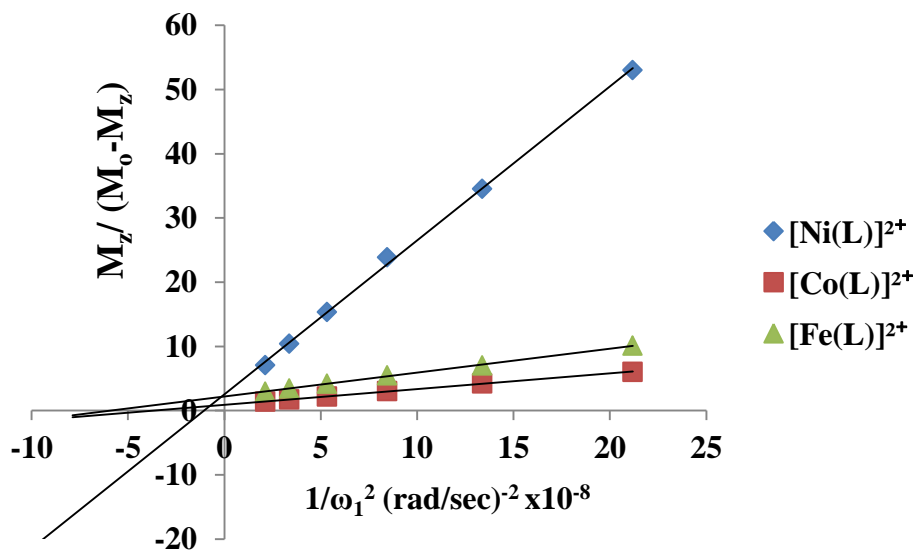

**Figure S11.** The plot of  $M_z / (M_0 - M_z)$  against the  $1/\omega_1^2$  (rad/sec)<sup>-2</sup> x 10<sup>-8</sup> recorded at 11.7 T of 10 mM complex in egg white pH 7.3-7.5. RF presaturation pulse applied for 4 seconds with varying  $B_1$  (8.2-24  $\mu\text{T}$ )



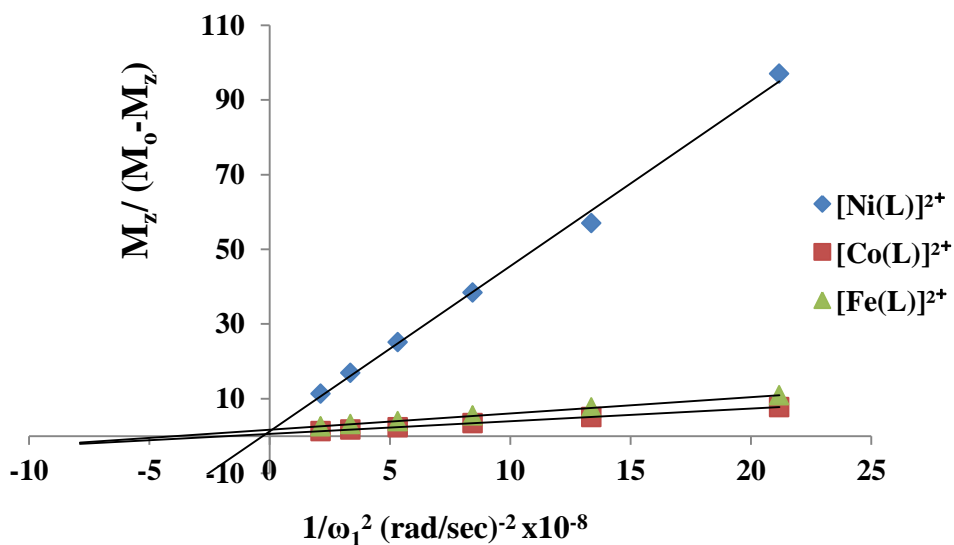

**Figure S12.** The plot of  $M_z / (M_0 - M_z)$  against the  $1/\omega_1^2$  (rad/sec)<sup>-2</sup> × 10<sup>-8</sup> recorded at 11.7 T of 10 mM complex in rabbit serum pH7.3-7.5. RF presaturation pulse applied for 4 seconds with varying  $B_1$  (8.2-24  $\mu$ T)

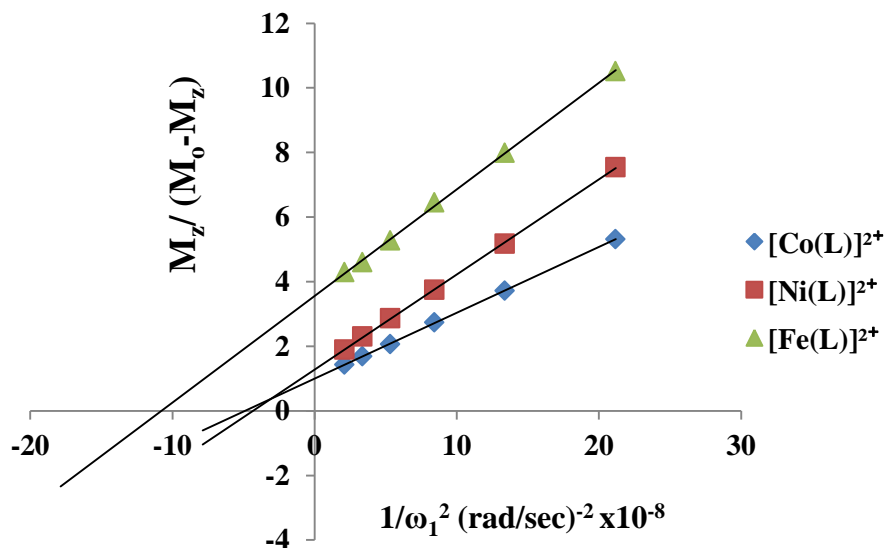

**Figure S13.** The plot of  $M_z / (M_0 - M_z)$  against the  $1/\omega_1^2$  (rad/sec)<sup>-2</sup> × 10<sup>-8</sup> recorded at 11.7 T of 10 mM complex, 100 mM NaCl, 20 mM HEPES in 4% agarose (w/w). RF presaturation pulse applied for 4 seconds with varying  $B_1$  (8.2-24  $\mu$ T)

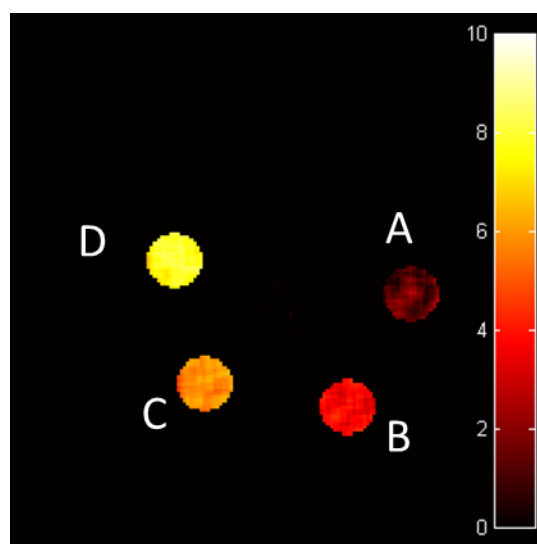

**Figure S14.** CEST phantom image of  $[\text{Fe}(\text{L})]^{2+}$  on a 4.7 T MRI scanner with  $B_1 = 12 \mu\text{T}$ . Samples contained A) 1 mM  $[\text{Fe}(\text{L})]^{2+}$ , B) 2 mM  $[\text{Fe}(\text{L})]^{2+}$ , C) 4 mM  $[\text{Fe}(\text{L})]^{2+}$ , D) 8 mM  $[\text{Fe}(\text{L})]^{2+}$  in 20 mM HEPES pH 7.3-7.4 and 100 mM NaCl. The scale represents the loss of water signal due to the presaturation pulse.

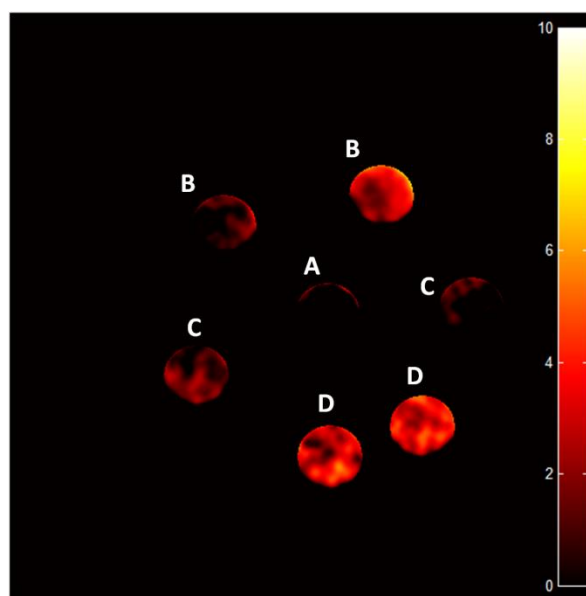

**Figure S15.** CEST images of phantoms on a MRI 4.7 T scanner with  $B_1 = 12 \mu\text{T}$ . Sample A consisted of 20 mM HEPES pH 7.4 and 100 mM NaCl. Solutions contained 4 mM  $[\text{Fe}(\text{L})]^{2+}$  in B) 20 mM HEPES pH 7.4 and 100 mM NaCl, C) rabbit serum D) 20 mM HEPES pH 7.4 and 100 mM NaCl in 4 % agarose pH 7.3-7.4 at 37 °C.

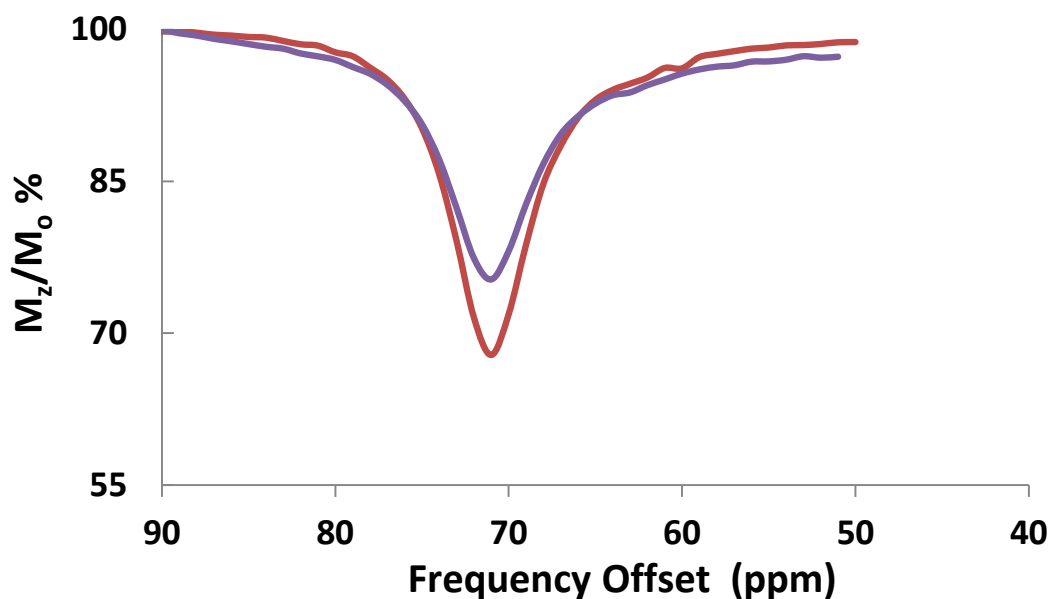

**Figure S16.** Overlaid CEST spectra of a solution containing 10 mM  $[\text{Ni}(\text{L})]^{2+}$ , 100 mM NaCl, 20 mM HEPES pH 7.2 (red) and 10 mM  $[\text{Ni}(\text{L})]^{2+}$  in albumin from porcine albumin (purple) pH 7.2. RF presaturation pulse applied for 2 seconds  $B_1 = 24 \mu\text{T}$  at 37 °C.

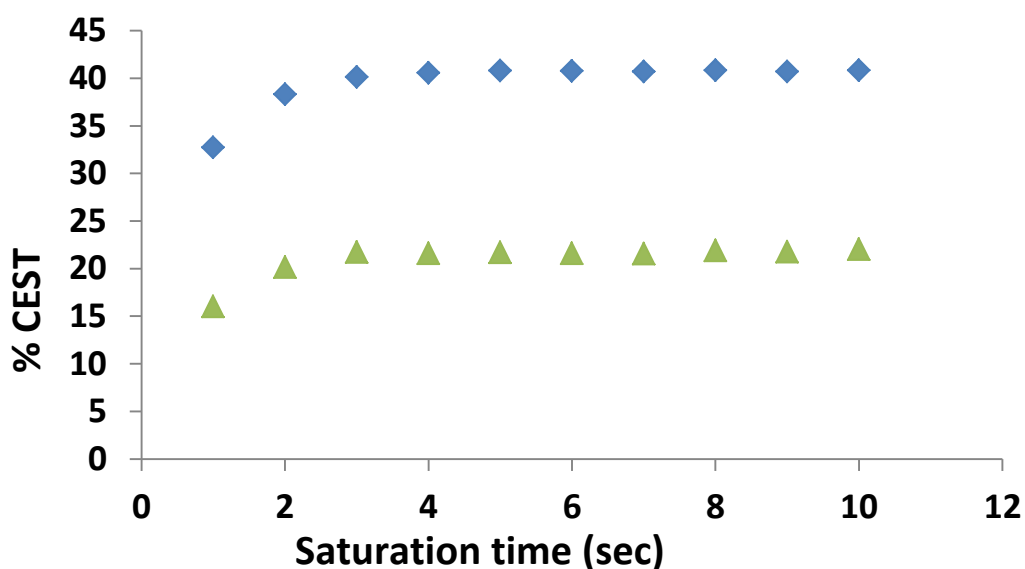

**Figure S17.** The CEST effect recorded at 11.7 T of a solution containing 10 mM  $[\text{Fe}(\text{L})]^{2+}$  ( $\Delta$ ) or 10 mM  $[\text{Ni}(\text{L})]^{2+}$  ( $\diamond$ ), 100 mM NaCl, 20 mM HEPES pH 7.4, RF presaturation pulse applied as noted (1-10 sec)  $B_1 = 24 \mu\text{T}$  at 37 °C.

**Table S1** Fractional Atomic Coordinates ( $\times 10^4$ ) and Equivalent Isotropic Displacement Parameters ( $\text{\AA}^2 \times 10^3$ ) for  $[\text{Fe}(\text{L})](\text{CF}_3\text{SO}_3)_2$ .

| Atom | x          | y           | z         | U(eq)     |
|------|------------|-------------|-----------|-----------|
| Fe1  | 7473.8(2)  | 5487.4(2)   | 4708.5(2) | 7.43(4)   |
| S2   | 9760.3(2)  | 10402.6(3)  | 3080.2(2) | 11.90(6)  |
| S1   | 5037.7(2)  | 9321.8(3)   | 3620.8(2) | 11.45(6)  |
| F1   | 5126.2(6)  | 9394.3(10)  | 2190.1(5) | 22.15(19) |
| F3   | 6300.1(6)  | 10229.7(10) | 2777.8(5) | 22.20(19) |
| O2   | 7647.8(7)  | 4926.8(10)  | 5918.4(5) | 14.38(18) |
| O1   | 7616.7(7)  | 7163.3(10)  | 3911.8(5) | 12.75(17) |
| O5   | 6097.6(6)  | 5672.7(9)   | 4905.6(5) | 10.80(17) |
| F5   | 9630.0(6)  | 7995.1(9)   | 3753.9(5) | 23.31(19) |
| O4   | 8848.3(6)  | 4959(1)     | 4684.8(5) | 11.95(17) |
| N1   | 7576.4(7)  | 4529.4(11)  | 3578.2(6) | 9.22(18)  |
| O3   | 7134.2(6)  | 3211.6(9)   | 4857.9(5) | 12.08(17) |
| O9   | 9166.8(7)  | 11030.9(11) | 3587.3(6) | 19.9(2)   |
| F6   | 10887.9(6) | 8291.5(10)  | 3225.1(5) | 25.0(2)   |
| F4   | 10640.6(7) | 9368.2(11)  | 4224.8(5) | 31.4(2)   |
| O6   | 5465.3(7)  | 7980.4(10)  | 3628.0(5) | 16.59(19) |
| O7   | 4061.7(7)  | 9334.1(12)  | 3541.4(6) | 20.8(2)   |
| F2   | 5048.7(7)  | 11397.1(10) | 2708.1(5) | 28.1(2)   |
| O8   | 5423.5(7)  | 10279.3(10) | 4163.8(5) | 15.69(19) |
| O10  | 9296.9(7)  | 9727.6(11)  | 2466.6(5) | 17.8(2)   |
| N2   | 7418.0(7)  | 7553.2(12)  | 5319.5(6) | 10.87(19) |
| O11  | 10545.2(7) | 11202.9(11) | 2905.8(6) | 21.0(2)   |
| N3   | 10042.3(7) | 4690.2(13)  | 3976.2(6) | 14.7(2)   |
| N4   | 4965.4(7)  | 6948.5(12)  | 5344.5(6) | 13.4(2)   |
| C14  | 5817.2(8)  | 6771.6(13)  | 5183.9(6) | 9.1(2)    |
| C2   | 7104.1(9)  | 5494.2(14)  | 3060.5(7) | 13.1(2)   |
| C1   | 7490.3(9)  | 6940.6(14)  | 3144.2(7) | 14.6(2)   |
| C12  | 9166.2(8)  | 4701.7(13)  | 4075.4(7) | 9.8(2)    |
| C13  | 6457.1(8)  | 7971.6(13)  | 5350.1(7) | 11.2(2)   |
| C6   | 7215.6(11) | 3656.0(16)  | 6117.4(8) | 19.8(3)   |
| C16  | 10252.0(9) | 8937.8(15)  | 3594.9(7) | 16.1(3)   |
| C11  | 8547.0(8)  | 4368.1(13)  | 3421.8(6) | 10.2(2)   |
| C9   | 7946.9(9)  | 8586.5(14)  | 4919.9(8) | 13.9(2)   |
| C15  | 5390.5(10) | 10126.0(14) | 2778.3(7) | 15.5(2)   |
| C10  | 7650.5(9)  | 8593.7(13)  | 4125.4(8) | 14.3(2)   |
| C4   | 7365.7(9)  | 2363.1(14)  | 4251.4(8) | 14.9(2)   |
| C7   | 7464.7(9)  | 6048.5(15)  | 6400.0(7) | 16.5(3)   |
| C8   | 7834.0(9)  | 7342.9(15)  | 6060.7(7) | 16.1(3)   |
| C3   | 7103.3(9)  | 3176.8(14)  | 3574.4(7) | 13.8(2)   |
| C5   | 7427.9(11) | 2617.7(15)  | 5542.2(8) | 18.9(3)   |

$U_{\text{eq}}$  is defined as 1/3 of the trace of the orthogonalised  $U_{\text{ij}}$  tensor.

**Table S2.** Anisotropic Displacement Parameters ( $\text{\AA}^2 \times 10^3$ ) for  $[\text{Fe}(\text{L})](\text{CF}_3\text{SO}_3)_2$ .

| Atom | U <sub>11</sub> | U <sub>22</sub> | U <sub>33</sub> | U <sub>23</sub> | U <sub>13</sub> | U <sub>12</sub> |
|------|-----------------|-----------------|-----------------|-----------------|-----------------|-----------------|
| Fe1  | 6.78(7)         | 7.53(8)         | 8.00(7)         | -0.45(6)        | 0.56(5)         | 1.12(6)         |
| S2   | 11.08(13)       | 11.34(14)       | 13.49(13)       | -0.86(11)       | 2.82(10)        | 0.41(11)        |
| S1   | 11.71(13)       | 11.31(14)       | 11.31(13)       | -0.88(10)       | 0.38(10)        | 1.07(11)        |
| F1   | 26.0(5)         | 28.4(5)         | 11.8(4)         | -2.3(3)         | -2.8(3)         | -3.0(4)         |
| F3   | 18.5(4)         | 28.7(5)         | 19.5(4)         | 3.0(4)          | 2.9(3)          | -6.9(4)         |
| O2   | 17.0(5)         | 16.7(5)         | 9.6(4)          | 0.0(3)          | 2.3(3)          | 5.1(4)          |
| O1   | 18.5(5)         | 8.7(4)          | 11.2(4)         | 0.6(3)          | 2.0(3)          | 0.4(3)          |
| O5   | 9.0(4)          | 8.8(4)          | 14.7(4)         | -2.5(3)         | 0.9(3)          | 1.1(3)          |
| F5   | 23.3(4)         | 17.6(4)         | 29.5(5)         | 8.5(4)          | 5.8(4)          | 3.4(4)          |
| O4   | 8.5(4)          | 17.7(5)         | 9.6(4)          | -1.4(3)         | 0.1(3)          | 2.0(3)          |
| N1   | 7.1(4)          | 9.6(5)          | 10.9(4)         | -0.3(4)         | -0.1(3)         | 0.2(4)          |
| O3   | 14.5(4)         | 9.1(4)          | 13.0(4)         | 1.2(3)          | 4.5(3)          | 3.1(3)          |
| O9   | 22.7(5)         | 14.9(5)         | 23.0(5)         | -1.0(4)         | 11.5(4)         | 4.8(4)          |
| F6   | 19.9(4)         | 28.6(5)         | 26.9(5)         | 0.8(4)          | 6.4(4)          | 13.4(4)         |
| F4   | 33.3(5)         | 40.0(6)         | 19.7(5)         | -4.8(4)         | -12.9(4)        | 7.1(5)          |
| O6   | 22.5(5)         | 10.4(4)         | 16.6(4)         | 0.0(3)          | -1.6(4)         | 2.7(4)          |
| O7   | 12.2(4)         | 27.6(6)         | 22.6(5)         | -1.5(4)         | 1.2(4)          | -0.2(4)         |
| F2   | 40.4(6)         | 15.8(4)         | 27.8(5)         | 8.2(4)          | -2.4(4)         | 7.5(4)          |
| O8   | 19.4(5)         | 13.6(5)         | 13.8(4)         | -4.8(3)         | -1.6(4)         | 2.9(4)          |
| O10  | 17.5(5)         | 21.3(5)         | 14.3(4)         | 0.3(4)          | -2.6(4)         | -1.2(4)         |
| N2   | 7.5(4)          | 12.0(5)         | 13.0(5)         | -3.1(4)         | -1.2(4)         | 0.6(4)          |
| O11  | 19.2(5)         | 19.5(5)         | 24.9(5)         | -2.4(4)         | 7.8(4)          | -6.9(4)         |
| N3   | 7.9(4)          | 24.9(6)         | 11.3(5)         | -2.5(4)         | 1.0(4)          | 1.5(4)          |
| N4   | 8.2(5)          | 11.0(5)         | 21.4(5)         | -4.4(4)         | 3.5(4)          | 0.0(4)          |
| C14  | 8.9(5)          | 9.1(5)          | 9.2(5)          | 0.3(4)          | 0.7(4)          | 0.8(4)          |
| C2   | 11.4(5)         | 17.6(6)         | 10.1(5)         | 0.7(4)          | -2.1(4)         | 2.2(5)          |
| C1   | 17.8(6)         | 15.9(6)         | 10.2(5)         | 3.1(4)          | 2.2(4)          | 4.5(5)          |
| C12  | 9.4(5)          | 9.4(5)          | 10.5(5)         | 0.7(4)          | 0.0(4)          | 2.1(4)          |
| C13  | 8.1(5)          | 10.5(5)         | 14.9(5)         | -3.8(4)         | 0.4(4)          | 0.8(4)          |
| C6   | 27.0(7)         | 19.2(7)         | 13.6(6)         | 5.9(5)          | 7.0(5)          | 5.7(6)          |
| C16  | 14.2(6)         | 19.9(7)         | 14.2(6)         | -1.6(5)         | -0.4(5)         | 4.2(5)          |
| C11  | 9.1(5)          | 12.7(6)         | 8.8(5)          | -1.4(4)         | 1.3(4)          | 1.1(4)          |
| C9   | 9.3(5)          | 9.3(6)          | 23.2(6)         | -4.5(5)         | 1.7(5)          | -2.2(4)         |
| C15  | 18.4(6)         | 13.0(6)         | 14.9(6)         | 1.4(5)          | -1.4(5)         | 0.3(5)          |
| C10  | 12.9(6)         | 7.5(5)          | 22.9(6)         | 0.6(5)          | 4.6(5)          | -0.2(4)         |
| C4   | 16.9(6)         | 8.3(6)          | 20.0(6)         | -1.9(5)         | 6.3(5)          | 1.1(5)          |
| C7   | 16.8(6)         | 23.6(7)         | 9.1(5)          | -3.7(5)         | -1.0(4)         | 7.5(5)          |
| C8   | 12.7(6)         | 21.9(7)         | 13.3(6)         | -8.3(5)         | -4.0(4)         | 3.1(5)          |
| C3   | 13.8(6)         | 12.5(6)         | 15.2(6)         | -4.9(4)         | 1.6(4)          | -3.6(5)         |
| C5   | 26.2(7)         | 14.0(6)         | 17.1(6)         | 7.3(5)          | 6.2(5)          | 7.2(5)          |

The Anisotropic displacement factor exponent takes the form:  $-2\pi^2[h^2a^{*2}U_{11}+2hka^*b^*U_{12}+\dots]c$

**Table S3.** Bond Lengths for [Fe(L)](CF<sub>3</sub>SO<sub>3</sub>)<sub>2</sub>.

| <b>Atom</b> | <b>Atom</b> | <b>Length/Å</b> | <b>Atom</b> | <b>Atom</b> | <b>Length/Å</b> |
|-------------|-------------|-----------------|-------------|-------------|-----------------|
| <b>Fe1</b>  | O2          | 2.2952(9)       | F5          | C16         | 1.3331(17)      |
| <b>Fe1</b>  | O1          | 2.1978(9)       | O4          | C12         | 1.2593(15)      |
| <b>Fe1</b>  | O5          | 2.0866(9)       | N1          | C2          | 1.4832(16)      |
| <b>Fe1</b>  | O4          | 2.0938(9)       | N1          | C11         | 1.4815(16)      |
| <b>Fe1</b>  | N1          | 2.2873(11)      | N1          | C3          | 1.4785(17)      |
| <b>Fe1</b>  | O3          | 2.2690(9)       | O3          | C4          | 1.4370(16)      |
| <b>Fe1</b>  | N2          | 2.2896(11)      | O3          | C5          | 1.4332(16)      |
| <b>S2</b>   | O9          | 1.4412(10)      | F6          | C16         | 1.3371(16)      |
| <b>S2</b>   | O10         | 1.4487(10)      | F4          | C16         | 1.3368(16)      |
| <b>S2</b>   | O11         | 1.4395(11)      | F2          | C15         | 1.3288(16)      |
| <b>S2</b>   | C16         | 1.8320(14)      | N2          | C13         | 1.4778(16)      |
| <b>S1</b>   | O6          | 1.4382(10)      | N2          | C9          | 1.4806(17)      |
| <b>S1</b>   | O7          | 1.4415(11)      | N2          | C8          | 1.4854(16)      |
| <b>S1</b>   | O8          | 1.4576(10)      | N3          | C12         | 1.3139(16)      |
| <b>S1</b>   | C15         | 1.8296(14)      | N4          | C14         | 1.3152(16)      |
| <b>F1</b>   | C15         | 1.3359(16)      | C14         | C13         | 1.5156(17)      |
| <b>F3</b>   | C15         | 1.3461(17)      | C2          | C1          | 1.511(2)        |
| <b>O2</b>   | C6          | 1.4355(18)      | C12         | C11         | 1.5132(17)      |
| <b>O2</b>   | C7          | 1.4312(16)      | C6          | C5          | 1.500(2)        |
| <b>O1</b>   | C1          | 1.4332(16)      | C9          | C10         | 1.508(2)        |
| <b>O1</b>   | C10         | 1.4335(16)      | C4          | C3          | 1.508(2)        |
| <b>O5</b>   | C14         | 1.2544(15)      | C7          | C8          | 1.508(2)        |

**Table S4** Bond Angles for [Fe(L)](CF<sub>3</sub>SO<sub>3</sub>)<sub>2</sub>.

| <b>Atom</b> | <b>Atom</b> | <b>Atom</b> | <b>Angle/°</b> | <b>Atom</b> | <b>Atom</b> | <b>Atom</b> | <b>Angle/°</b> |
|-------------|-------------|-------------|----------------|-------------|-------------|-------------|----------------|
| <b>O1</b>   | Fe1         | O2          | 144.15(4)      | <b>C11</b>  | <b>N1</b>   | <b>C2</b>   | 111.85(10)     |
| <b>O1</b>   | Fe1         | <b>N1</b>   | 71.18(4)       | <b>C3</b>   | <b>N1</b>   | <b>Fe1</b>  | 108.05(8)      |
| <b>O1</b>   | Fe1         | <b>O3</b>   | 145.01(3)      | <b>C3</b>   | <b>N1</b>   | <b>C2</b>   | 109.94(10)     |
| <b>O1</b>   | Fe1         | <b>N2</b>   | 72.28(4)       | <b>C3</b>   | <b>N1</b>   | <b>C11</b>  | 111.53(10)     |
| <b>O5</b>   | Fe1         | <b>O2</b>   | 85.39(4)       | <b>C4</b>   | <b>O3</b>   | <b>Fe1</b>  | 113.23(7)      |
| <b>O5</b>   | Fe1         | <b>O1</b>   | 100.13(4)      | <b>C5</b>   | <b>O3</b>   | <b>Fe1</b>  | 115.62(8)      |
| <b>O5</b>   | Fe1         | <b>O4</b>   | 167.38(4)      | <b>C5</b>   | <b>O3</b>   | <b>C4</b>   | 112.49(10)     |
| <b>O5</b>   | Fe1         | <b>N1</b>   | 107.25(4)      | <b>C13</b>  | <b>N2</b>   | <b>Fe1</b>  | 108.13(7)      |
| <b>O5</b>   | Fe1         | <b>O3</b>   | 80.77(3)       | <b>C13</b>  | <b>N2</b>   | <b>C9</b>   | 111.31(10)     |
| <b>O5</b>   | Fe1         | <b>N2</b>   | 77.52(4)       | <b>C13</b>  | <b>N2</b>   | <b>C8</b>   | 111.16(10)     |
| <b>O4</b>   | Fe1         | <b>O2</b>   | 84.02(4)       | <b>C9</b>   | <b>N2</b>   | <b>Fe1</b>  | 108.02(8)      |
| <b>O4</b>   | Fe1         | <b>O1</b>   | 92.48(4)       | <b>C9</b>   | <b>N2</b>   | <b>C8</b>   | 110.02(10)     |
| <b>O4</b>   | Fe1         | <b>N1</b>   | 77.29(4)       | <b>C8</b>   | <b>N2</b>   | <b>Fe1</b>  | 108.07(8)      |
| <b>O4</b>   | Fe1         | <b>O3</b>   | 89.25(4)       | <b>O5</b>   | <b>C14</b>  | <b>N4</b>   | 122.47(11)     |
| <b>O4</b>   | Fe1         | <b>N2</b>   | 106.11(4)      | <b>O5</b>   | <b>C14</b>  | <b>C13</b>  | 120.85(11)     |
| <b>N1</b>   | Fe1         | <b>O2</b>   | 141.14(4)      | <b>N4</b>   | <b>C14</b>  | <b>C13</b>  | 116.68(11)     |
| <b>N1</b>   | Fe1         | <b>N2</b>   | 143.41(4)      | <b>N1</b>   | <b>C2</b>   | <b>C1</b>   | 110.37(10)     |
| <b>O3</b>   | Fe1         | <b>O2</b>   | 70.78(4)       | <b>O1</b>   | <b>C1</b>   | <b>C2</b>   | 105.71(10)     |
| <b>O3</b>   | Fe1         | <b>N1</b>   | 75.17(4)       | <b>O4</b>   | <b>C12</b>  | <b>N3</b>   | 122.21(11)     |
| <b>O3</b>   | Fe1         | <b>N2</b>   | 140.16(4)      | <b>O4</b>   | <b>C12</b>  | <b>C11</b>  | 120.95(11)     |
| <b>N2</b>   | Fe1         | <b>O2</b>   | 74.51(4)       | <b>N3</b>   | <b>C12</b>  | <b>C11</b>  | 116.83(11)     |
| <b>O9</b>   | <b>S2</b>   | <b>O10</b>  | 114.46(7)      | <b>N2</b>   | <b>C13</b>  | <b>C14</b>  | 112.01(10)     |
| <b>O9</b>   | <b>S2</b>   | <b>C16</b>  | 103.11(6)      | <b>O2</b>   | <b>C6</b>   | <b>C5</b>   | 106.25(11)     |
| <b>O10</b>  | <b>S2</b>   | <b>C16</b>  | 102.71(6)      | <b>F5</b>   | <b>C16</b>  | <b>S2</b>   | 112.18(9)      |
| <b>O11</b>  | <b>S2</b>   | <b>O9</b>   | 115.94(6)      | <b>F5</b>   | <b>C16</b>  | <b>F6</b>   | 107.45(12)     |
| <b>O11</b>  | <b>S2</b>   | <b>O10</b>  | 115.07(6)      | <b>F5</b>   | <b>C16</b>  | <b>F4</b>   | 107.11(12)     |
| <b>O11</b>  | <b>S2</b>   | <b>C16</b>  | 102.93(7)      | <b>F6</b>   | <b>C16</b>  | <b>S2</b>   | 111.50(10)     |
| <b>O6</b>   | <b>S1</b>   | <b>O7</b>   | 116.39(7)      | <b>F4</b>   | <b>C16</b>  | <b>S2</b>   | 110.77(10)     |
| <b>O6</b>   | <b>S1</b>   | <b>O8</b>   | 113.86(6)      | <b>F4</b>   | <b>C16</b>  | <b>F6</b>   | 107.59(11)     |
| <b>O6</b>   | <b>S1</b>   | <b>C15</b>  | 104.32(6)      | <b>N1</b>   | <b>C11</b>  | <b>C12</b>  | 112.25(10)     |
| <b>O7</b>   | <b>S1</b>   | <b>O8</b>   | 115.02(6)      | <b>N2</b>   | <b>C9</b>   | <b>C10</b>  | 110.37(10)     |
| <b>O7</b>   | <b>S1</b>   | <b>C15</b>  | 103.35(6)      | <b>F1</b>   | <b>C15</b>  | <b>S1</b>   | 112.31(10)     |
| <b>O8</b>   | <b>S1</b>   | <b>C15</b>  | 101.30(6)      | <b>F1</b>   | <b>C15</b>  | <b>F3</b>   | 107.12(12)     |
| <b>C6</b>   | <b>O2</b>   | <b>Fe1</b>  | 114.61(8)      | <b>F3</b>   | <b>C15</b>  | <b>S1</b>   | 110.67(9)      |
| <b>C7</b>   | <b>O2</b>   | <b>Fe1</b>  | 114.03(8)      | <b>F2</b>   | <b>C15</b>  | <b>S1</b>   | 110.60(10)     |
| <b>C7</b>   | <b>O2</b>   | <b>C6</b>   | 112.83(11)     | <b>F2</b>   | <b>C15</b>  | <b>F1</b>   | 108.15(11)     |
| <b>C1</b>   | <b>O1</b>   | <b>Fe1</b>  | 122.39(8)      | <b>F2</b>   | <b>C15</b>  | <b>F3</b>   | 107.81(12)     |
| <b>C1</b>   | <b>O1</b>   | <b>C10</b>  | 114.57(10)     | <b>O1</b>   | <b>C10</b>  | <b>C9</b>   | 105.47(10)     |
| <b>C10</b>  | <b>O1</b>   | <b>Fe1</b>  | 121.78(8)      | <b>O3</b>   | <b>C4</b>   | <b>C3</b>   | 106.56(10)     |
| <b>C14</b>  | <b>O5</b>   | <b>Fe1</b>  | 118.96(8)      | <b>O2</b>   | <b>C7</b>   | <b>C8</b>   | 106.66(11)     |
| <b>C12</b>  | <b>O4</b>   | <b>Fe1</b>  | 117.76(8)      | <b>N2</b>   | <b>C8</b>   | <b>C7</b>   | 110.55(11)     |
| <b>C2</b>   | <b>N1</b>   | <b>Fe1</b>  | 106.47(8)      | <b>N1</b>   | <b>C3</b>   | <b>C4</b>   | 110.51(10)     |
| <b>C11</b>  | <b>N1</b>   | <b>Fe1</b>  | 108.80(7)      | <b>O3</b>   | <b>C5</b>   | <b>C6</b>   | 106.84(11)     |

**Table S5.** Torsion Angles for [Fe(L)](CF<sub>3</sub>SO<sub>3</sub>)<sub>2</sub>.

| <b>A</b>   | <b>B</b> | <b>C</b> | <b>D</b> | <b>Angle/°</b> | <b>A</b> | <b>B</b> | <b>C</b> | <b>D</b> | <b>Angle/°</b> |
|------------|----------|----------|----------|----------------|----------|----------|----------|----------|----------------|
| <b>Fe1</b> | O2       | C6       | C5       | 44.11(13)      | O8       | S1       | C15      | F1       | 178.46(10)     |
| <b>Fe1</b> | O2       | C7       | C8       | -38.33(12)     | O8       | S1       | C15      | F3       | 58.80(11)      |
| <b>Fe1</b> | O1       | C1       | C2       | 9.58(13)       | O8       | S1       | C15      | F2       | -60.61(11)     |
| <b>Fe1</b> | O1       | C10      | C9       | 22.17(13)      | O10      | S2       | C16      | F5       | -54.54(11)     |
| <b>Fe1</b> | O5       | C14      | N4       | -177.88(9)     | O10      | S2       | C16      | F6       | 66.03(11)      |
| <b>Fe1</b> | O5       | C14      | C13      | 2.26(15)       | O10      | S2       | C16      | F4       | -174.19(10)    |
| <b>Fe1</b> | O4       | C12      | N3       | 163.26(10)     | N2       | C9       | C10      | O1       | -47.03(13)     |
| <b>Fe1</b> | O4       | C12      | C11      | -17.65(15)     | O11      | S2       | C16      | F5       | -174.37(10)    |
| <b>Fe1</b> | N1       | C2       | C1       | 54.36(11)      | O11      | S2       | C16      | F6       | -53.80(11)     |
| <b>Fe1</b> | N1       | C11      | C12      | 7.23(12)       | O11      | S2       | C16      | F4       | 65.99(11)      |
| <b>Fe1</b> | N1       | C3       | C4       | -45.38(11)     | N3       | C12      | C11      | N1       | -175.04(11)    |
| <b>Fe1</b> | O3       | C4       | C3       | -40.99(12)     | N4       | C14      | C13      | N2       | 166.09(11)     |
| <b>Fe1</b> | O3       | C5       | C6       | 43.08(14)      | C2       | N1       | C11      | C12      | 124.56(11)     |
| <b>Fe1</b> | N2       | C13      | C14      | 16.80(12)      | C2       | N1       | C3       | C4       | -161.19(11)    |
| <b>Fe1</b> | N2       | C9       | C10      | 50.68(11)      | C1       | O1       | C10      | C9       | -170.37(10)    |
| <b>Fe1</b> | N2       | C8       | C7       | -47.34(12)     | C13      | N2       | C9       | C10      | -67.89(13)     |
| <b>O2</b>  | C6       | C5       | O3       | -55.14(15)     | C13      | N2       | C8       | C7       | 71.17(13)      |
| <b>O2</b>  | C7       | C8       | N2       | 57.28(13)      | C6       | O2       | C7       | C8       | -171.36(11)    |
| <b>O5</b>  | C14      | C13      | N2       | -14.05(16)     | C11      | N1       | C2       | C1       | -64.36(13)     |
| <b>O4</b>  | C12      | C11      | N1       | 5.82(17)       | C11      | N1       | C3       | C4       | 74.16(13)      |
| <b>N1</b>  | C2       | C1       | O1       | -41.98(13)     | C9       | N2       | C13      | C14      | 135.30(11)     |
| <b>O3</b>  | C4       | C3       | N1       | 57.93(13)      | C9       | N2       | C8       | C7       | -165.07(11)    |
| <b>O9</b>  | S2       | C16      | F5       | 64.68(11)      | C10      | O1       | C1       | C2       | -157.80(10)    |
| <b>O9</b>  | S2       | C16      | F6       | -174.74(10)    | C4       | O3       | C5       | C6       | 175.31(11)     |
| <b>O9</b>  | S2       | C16      | F4       | -54.96(11)     | C7       | O2       | C6       | C5       | 176.86(11)     |
| <b>O6</b>  | S1       | C15      | F1       | 59.99(11)      | C8       | N2       | C13      | C14      | -101.67(12)    |
| <b>O6</b>  | S1       | C15      | F3       | -59.67(11)     | C8       | N2       | C9       | C10      | 168.44(10)     |
| <b>O6</b>  | S1       | C15      | F2       | -179.08(9)     | C3       | N1       | C2       | C1       | 171.17(10)     |
| <b>O7</b>  | S1       | C15      | F1       | -62.15(11)     | C3       | N1       | C11      | C12      | -111.86(12)    |
| <b>O7</b>  | S1       | C15      | F3       | 178.18(10)     | C5       | O3       | C4       | C3       | -174.39(11)    |
| <b>O7</b>  | S1       | C15      | F2       | 58.77(11)      |          |          |          |          |                |



**Table S6.** Hydrogen Atom Coordinates ( $\text{\AA}\times 10^4$ ) and Isotropic Displacement Parameters ( $\text{\AA}^2\times 10^3$ ) for  $[\text{Fe}(\text{L})](\text{CF}_3\text{SO}_3)_2$ .

| Atom | x     | y    | z    | U(eq) |
|------|-------|------|------|-------|
| H3A  | 10420 | 4862 | 4334 | 18    |
| H3B  | 10238 | 4511 | 3553 | 18    |
| H4A  | 4577  | 6297 | 5259 | 16    |
| H4B  | 4797  | 7716 | 5535 | 16    |
| H2A  | 6462  | 5510 | 3151 | 16    |
| H2B  | 7174  | 5172 | 2567 | 16    |
| H1A  | 8064  | 7011 | 2909 | 17    |
| H1B  | 7074  | 7620 | 2930 | 17    |
| H13A | 6333  | 8711 | 5002 | 13    |
| H13B | 6349  | 8329 | 5831 | 13    |
| H6A  | 6565  | 3787 | 6137 | 24    |
| H6B  | 7449  | 3344 | 6590 | 24    |
| H11A | 8690  | 4978 | 3024 | 12    |
| H11B | 8655  | 3421 | 3269 | 12    |
| H9A  | 8587  | 8363 | 4971 | 17    |
| H9B  | 7859  | 9501 | 5125 | 17    |
| H10A | 7059  | 9022 | 4055 | 17    |
| H10B | 8081  | 9100 | 3843 | 17    |
| H4C  | 7038  | 1491 | 4257 | 18    |
| H4D  | 8011  | 2166 | 4271 | 18    |
| H7A  | 7759  | 5889 | 6874 | 20    |
| H7B  | 6817  | 6137 | 6458 | 20    |
| H8A  | 7706  | 8139 | 6362 | 19    |
| H8B  | 8487  | 7264 | 6033 | 19    |
| H3C  | 7260  | 2651 | 3148 | 17    |
| H3D  | 6453  | 3327 | 3549 | 17    |
| H5A  | 8074  | 2431 | 5551 | 23    |
| H5B  | 7111  | 1753 | 5623 | 23    |

**Table S7.** Fractional Atomic Coordinates ( $\times 10^4$ ) and Equivalent Isotropic Displacement Parameters ( $\text{\AA}^2 \times 10^3$ ) for  $[\text{Co}(\text{L})]\text{Cl}_2 \cdot 2\text{H}_2\text{O}$ .

| Atom | x           | y           | z          | U(eq)    |
|------|-------------|-------------|------------|----------|
| Co1  | -3775.1(3)  | -3775.1(3)  | -5000      | 8.97(7)  |
| Cl1  | -9256.4(6)  | -9361.9(6)  | -6009.3(2) | 14.02(8) |
| O3   | -2400.6(18) | -5285.0(17) | -4635.9(3) | 13.2(2)  |
| O2   | -4578.0(17) | -6550.4(17) | -5212.9(3) | 13.1(2)  |
| O4   | -5274(2)    | -7960(2)    | -3924.2(4) | 18.9(3)  |
| O1   | -1602.5(18) | -1602.5(18) | -5000      | 22.6(4)  |
| N2   | -1214(2)    | -5331(2)    | -4100.1(4) | 14.3(3)  |
| C6   | -2721(2)    | -2977(2)    | -5738.8(4) | 12.6(3)  |
| N1   | -1993(2)    | -4134(2)    | -5458.8(4) | 11.1(3)  |
| C2   | -106(2)     | -3602(3)    | -5366.6(5) | 16.4(3)  |
| C7   | -2167(2)    | -4564(2)    | -4348.5(4) | 10.5(3)  |
| C4   | -3902(3)    | -6816(3)    | -5556.4(5) | 18.0(4)  |
| C5   | -6458(2)    | -7004(3)    | -5179.3(5) | 16.6(4)  |
| C1   | -59(3)      | -1706(3)    | -5217.4(5) | 17.8(4)  |
| C3   | -2005(3)    | -6073(2)    | -5561.4(5) | 16.3(3)  |

$U_{\text{eq}}$  is defined as 1/3 of the trace of the orthogonalised  $U_{\text{ij}}$  tensor

**Table S8.** Anisotropic Displacement Parameters ( $\text{\AA}^2 \times 10^3$ ) for  $[\text{Co}(\text{L})]\text{Cl}_2 \cdot 2\text{H}_2\text{O}$ .

| Atom | $U_{11}$  | $U_{22}$  | $U_{33}$  | $U_{23}$ | $U_{13}$ | $U_{12}$ |
|------|-----------|-----------|-----------|----------|----------|----------|
| Co1  | 10.37(9)  | 10.37(9)  | 6.16(14)  | -0.24(8) | 0.24(8)  | 3.12(10) |
| Cl1  | 12.76(18) | 15.20(18) | 14.11(19) | 0.89(15) | 0.80(14) | 3.18(13) |
| O3   | 15.7(6)   | 13.2(6)   | 10.7(6)   | -0.6(5)  | -2.0(5)  | 4.7(4)   |
| O2   | 13.3(6)   | 14.4(6)   | 11.6(6)   | -2.4(5)  | -0.3(5)  | 0.0(4)   |
| O4   | 18.6(7)   | 17.6(7)   | 20.6(7)   | -3.5(6)  | -2.2(5)  | 1.3(5)   |
| O1   | 21.7(6)   | 21.7(6)   | 24.5(10)  | -12.6(7) | 12.6(7)  | -9.1(7)  |
| N2   | 17.6(7)   | 13.5(6)   | 11.7(7)   | 1.0(5)   | -2.1(6)  | 4.2(6)   |
| C6   | 12.7(7)   | 15.6(7)   | 9.4(7)    | -0.1(6)  | 0.7(6)   | 3.2(6)   |
| N1   | 11.2(6)   | 13.2(7)   | 8.8(6)    | -1.3(5)  | -0.3(5)  | 3.5(5)   |
| C2   | 9.4(7)    | 26.0(9)   | 13.7(9)   | -2.9(7)  | -0.3(6)  | 3.5(7)   |
| C7   | 9.5(7)    | 11.3(7)   | 10.6(8)   | 1.6(6)   | 0.5(6)   | 0.2(5)   |
| C4   | 26.5(9)   | 15.3(8)   | 12.2(8)   | -5.4(6)  | 3.0(7)   | -2.1(7)  |
| C5   | 15.4(8)   | 16.4(8)   | 18.0(9)   | -1.4(7)  | -2.0(7)  | -2.4(6)  |
| C1   | 14.6(8)   | 26.8(9)   | 12.0(9)   | -2.2(7)  | 2.6(6)   | -5.6(7)  |
| C3   | 21.7(8)   | 13.1(8)   | 14.3(8)   | -3.2(6)  | 5.2(7)   | 5.8(7)   |

The Anisotropic displacement factor exponent takes the form:  $-2\pi^2[h^2a^{*2}U_{11}+2hka^*b^*U_{12}+\dots]$

**Table S9.** Bond Lengths for [Co(L)]Cl<sub>2</sub>•2H<sub>2</sub>O

| Atom | Atom            | Length/Å   | Atom | Atom            | Length/Å |
|------|-----------------|------------|------|-----------------|----------|
| Co1  | O3              | 2.0631(12) | O1   | C1              | 1.417(2) |
| Co1  | O3 <sup>1</sup> | 2.0631(12) | N2   | C7              | 1.320(2) |
| Co1  | O2 <sup>1</sup> | 2.2799(13) | C6   | N1              | 1.482(2) |
| Co1  | O2              | 2.2800(13) | C6   | C7 <sup>1</sup> | 1.518(2) |
| Co1  | O1              | 2.2595(19) | N1   | C2              | 1.485(2) |
| Co1  | N1              | 2.2287(14) | N1   | C3              | 1.481(2) |
| Co1  | N1 <sup>1</sup> | 2.2288(14) | C2   | C1              | 1.511(3) |
| O3   | C7              | 1.249(2)   | C7   | C6 <sup>1</sup> | 1.518(2) |
| O2   | C4              | 1.438(2)   | C4   | C3              | 1.498(3) |
| O2   | C5              | 1.428(2)   | C5   | C5 <sup>1</sup> | 1.505(4) |
| O1   | C1 <sup>1</sup> | 1.417(2)   |      |                 |          |

<sup>1</sup>+Y,+X,-1-Z**Table S10.** Bond Angles for [Co(L)]Cl<sub>2</sub>•2H<sub>2</sub>O.

| Atom            | Atom | Atom            | Angle/°    | Atom            | Atom | Atom            | Angle/°    |
|-----------------|------|-----------------|------------|-----------------|------|-----------------|------------|
| O3 <sup>1</sup> | Co1  | O3              | 176.09(8)  | C4              | O2   | Co1             | 111.65(11) |
| O3              | Co1  | O2              | 83.91(5)   | C5              | O2   | Co1             | 115.26(10) |
| O3              | Co1  | O2 <sup>1</sup> | 92.89(5)   | C5              | O2   | C4              | 112.81(14) |
| O3 <sup>1</sup> | Co1  | O2              | 92.88(5)   | C1 <sup>1</sup> | O1   | Co1             | 121.90(10) |
| O3 <sup>1</sup> | Co1  | O2 <sup>1</sup> | 83.91(5)   | C1              | O1   | Co1             | 121.90(10) |
| O3              | Co1  | O1              | 91.96(4)   | C1              | O1   | C1 <sup>1</sup> | 116.2(2)   |
| O3 <sup>1</sup> | Co1  | O1              | 91.96(4)   | N1              | C6   | C7 <sup>1</sup> | 112.56(14) |
| O3 <sup>1</sup> | Co1  | N1              | 79.97(5)   | C6              | N1   | Co1             | 107.89(10) |
| O3              | Co1  | N1              | 101.36(5)  | C6              | N1   | C2              | 111.34(15) |
| O3 <sup>1</sup> | Co1  | N1 <sup>1</sup> | 101.36(5)  | C2              | N1   | Co1             | 108.98(11) |
| O3              | Co1  | N1 <sup>1</sup> | 79.96(5)   | C3              | N1   | Co1             | 109.01(11) |
| O2 <sup>1</sup> | Co1  | O2              | 70.61(6)   | C3              | N1   | C6              | 110.68(14) |
| O1              | Co1  | O2              | 144.69(3)  | C3              | N1   | C2              | 108.89(14) |
| O1              | Co1  | O2 <sup>1</sup> | 144.70(3)  | N1              | C2   | C1              | 110.91(15) |
| N1              | Co1  | O2              | 75.88(5)   | O3              | C7   | N2              | 123.08(16) |
| N1 <sup>1</sup> | Co1  | O2              | 141.82(5)  | O3              | C7   | C6 <sup>1</sup> | 121.68(15) |
| N1              | Co1  | O2 <sup>1</sup> | 141.82(5)  | N2              | C7   | C6 <sup>1</sup> | 115.25(15) |
| N1 <sup>1</sup> | Co1  | O2 <sup>1</sup> | 75.88(5)   | O2              | C4   | C3              | 106.53(15) |
| N1              | Co1  | O1              | 70.60(4)   | O2              | C5   | C5 <sup>1</sup> | 106.29(12) |
| N1 <sup>1</sup> | Co1  | O1              | 70.60(4)   | O1              | C1   | C2              | 105.06(15) |
| N1              | Co1  | N1 <sup>1</sup> | 141.19(8)  | N1              | C3   | C4              | 110.68(15) |
| C7              | O3   | Co1             | 116.90(11) |                 |      |                 |            |

<sup>1</sup>+Y,+X,-1-Z

**Table S11.** Torsion Angles for [Co(L)]Cl<sub>2</sub>•2H<sub>2</sub>O.

| A   | B  | C  | D               | Angle/°     | A               | B  | C  | D               | Angle/°     |
|-----|----|----|-----------------|-------------|-----------------|----|----|-----------------|-------------|
| Co1 | O3 | C7 | N2              | -175.62(13) | N1              | C2 | C1 | O1              | 40.8(2)     |
| Co1 | O3 | C7 | C6 <sup>1</sup> | 4.5(2)      | C2              | N1 | C3 | C4              | 163.37(16)  |
| Co1 | O2 | C4 | C3              | 41.47(16)   | C7 <sup>1</sup> | C6 | N1 | Co1             | -9.09(17)   |
| Co1 | O2 | C5 | C5 <sup>1</sup> | -43.90(19)  | C7 <sup>1</sup> | C6 | N1 | C2              | -128.63(15) |
| Co1 | O1 | C1 | C2              | -10.36(17)  | C7 <sup>1</sup> | C6 | N1 | C3              | 110.10(16)  |
| Co1 | N1 | C2 | C1              | -54.03(17)  | C4              | O2 | C5 | C5 <sup>1</sup> | -173.76(16) |
| Co1 | N1 | C3 | C4              | 44.59(17)   | C5              | O2 | C4 | C3              | 173.15(14)  |
| O2  | C4 | C3 | N1              | -57.72(19)  | C1 <sup>1</sup> | O1 | C1 | C2              | 169.63(17)  |
| C6  | N1 | C2 | C1              | 64.86(19)   | C3              | N1 | C2 | C1              | -172.84(15) |
| C6  | N1 | C3 | C4              | -73.92(18)  |                 |    |    |                 |             |

<sup>1</sup>+Y,+X,-1-Z
**Table S12.** Hydrogen Atom Coordinates (Å×10<sup>4</sup>) and Isotropic Displacement Parameters (Å<sup>2</sup>×10<sup>3</sup>) for [Co(L)]Cl<sub>2</sub>•2H<sub>2</sub>O.

| Atom | x         | y         | z        | U(eq) |
|------|-----------|-----------|----------|-------|
| H2A  | -719      | -6377     | -4133    | 17    |
| H2B  | -1087     | -4786     | -3906    | 17    |
| H6A  | -2830     | -3699     | -5947    | 15    |
| H6B  | -1869     | -1999     | -5785    | 15    |
| H2C  | 655       | -3650     | -5570    | 20    |
| H2D  | 377       | -4457     | -5200    | 20    |
| H4A  | -4659     | -6177     | -5721    | 22    |
| H4B  | -3898     | -8099     | -5614    | 22    |
| H5A  | -6639     | -8299     | -5213    | 20    |
| H5B  | -7176     | -6351     | -5348    | 20    |
| H1A  | 1050      | -1514     | -5087    | 21    |
| H1B  | -128      | -800      | -5398    | 21    |
| H3A  | -1248     | -6767     | -5405    | 20    |
| H3B  | -1501     | -6194     | -5791    | 20    |
| H4C  | -5300(40) | -7050(40) | -3837(7) | 23(7) |
| H4D  | -6350(40) | -8320(40) | -3928(8) | 36(8) |

**TableS13.** Fractional Atomic Coordinates ( $\times 10^4$ ) and Equivalent Isotropic Displacement Parameters ( $\text{\AA}^2 \times 10^3$ ) for  $[\text{Ni}(\text{L})](\text{CF}_3\text{SO}_3)_2 \cdot \text{H}_2\text{O}$ .

| Atom | x           | y          | z          | U(eq)    |
|------|-------------|------------|------------|----------|
| Ni1  | 1906.7(2)   | 6367.6(2)  | 3991.3(2)  | 8.78(6)  |
| S1   | 7104.6(4)   | 5236.6(2)  | 3902.2(2)  | 12.25(9) |
| S2   | 2416.4(19)  | 3293.6(12) | 4290(2)    | 13.2(3)  |
| O4   | 3357(1)     | 6420.0(5)  | 4592.7(6)  | 13.2(2)  |
| O3   | 2968.7(10)  | 6742.4(5)  | 3152.1(6)  | 12.6(2)  |
| O5   | 616.4(10)   | 6444.7(5)  | 3290.3(6)  | 11.2(2)  |
| O6   | 6472.7(11)  | 5672.9(5)  | 3531.1(6)  | 16.9(3)  |
| O2   | 2137.5(10)  | 7458.4(6)  | 3959.6(6)  | 14.7(2)  |
| O1   | 1206.5(11)  | 5694.0(5)  | 4427.4(6)  | 17.3(3)  |
| O7   | 6638.4(11)  | 5104.5(6)  | 4504.5(6)  | 17.9(3)  |
| O8   | 8345.2(11)  | 5278.6(6)  | 3936.6(7)  | 24.6(3)  |
| O12  | 3381.4(11)  | 3117.0(6)  | 6437.2(7)  | 18.5(3)  |
| F2   | 7214.8(13)  | 4143.3(5)  | 3737.9(6)  | 34.7(3)  |
| O10  | 1503(3)     | 2878(2)    | 4277(4)    | 23.6(8)  |
| N2   | 2776.6(12)  | 5657.5(6)  | 3626.2(7)  | 10.7(3)  |
| N1   | 638.0(12)   | 6746.6(6)  | 4557.5(6)  | 9.8(3)   |
| O11  | 3580(5)     | 3071.1(19) | 4412(3)    | 24.7(7)  |
| C13  | -498.2(14)  | 6685.3(7)  | 4169.6(8)  | 11.0(3)  |
| F1   | 7212.1(15)  | 4620.6(6)  | 2861.6(6)  | 44.1(4)  |
| O9   | 2201(4)     | 3814.4(18) | 4621(4)    | 26.5(8)  |
| F3   | 5637.1(13)  | 4522.8(6)  | 3317.2(8)  | 45.3(4)  |
| C8   | 3199.4(15)  | 5768.6(7)  | 2987.6(8)  | 13.2(3)  |
| C12  | 4074.3(14)  | 6032.4(7)  | 4536.6(8)  | 11.7(3)  |
| N4   | -1238.4(12) | 6697.1(6)  | 3042.6(7)  | 13.8(3)  |
| C14  | -343.4(14)  | 6604.0(7)  | 3463.5(8)  | 9.9(3)   |
| F4   | 3219(3)     | 3891.0(8)  | 3363.1(10) | 44.0(6)  |
| N3   | 5122.1(13)  | 6037.8(7)  | 4841.7(7)  | 16.7(3)  |
| C10  | 1328.1(15)  | 5133.8(7)  | 4191.8(8)  | 14.3(3)  |
| C3   | 845.3(14)   | 7346.0(7)  | 4744.5(8)  | 12.0(3)  |
| C7   | 3793.7(14)  | 6334.0(7)  | 2982.7(8)  | 13.0(3)  |
| C4   | 1103.5(14)  | 7692.3(7)  | 4166.9(8)  | 13.4(3)  |
| F5   | 1385(3)     | 3747.2(10) | 3229.3(12) | 68.1(9)  |
| C2   | 709.9(15)   | 6391.1(7)  | 5151.2(8)  | 12.8(3)  |
| C5   | 2457.5(16)  | 7672.6(7)  | 3365.5(9)  | 16.3(3)  |
| F6   | 2573(3)     | 3068.7(10) | 3067.1(10) | 64.1(9)  |
| C11  | 3749.3(14)  | 5523.8(7)  | 4116.6(8)  | 12.5(3)  |

|             |            |            |            |         |
|-------------|------------|------------|------------|---------|
| <b>C1</b>   | 573.2(15)  | 5772.7(7)  | 4979.1(8)  | 13.8(3) |
| <b>C6</b>   | 3427.0(15) | 7301.7(7)  | 3188.2(9)  | 15.3(3) |
| <b>C9</b>   | 1898.0(15) | 5199.2(7)  | 3567.7(8)  | 14.3(3) |
| <b>C15</b>  | 6773.0(19) | 4599.5(8)  | 3428.5(10) | 23.4(4) |
| <b>C16</b>  | 2397(3)    | 3512.2(12) | 3442.8(14) | 33.6(7) |
| <b>F4A</b>  | 3720(20)   | 3777(7)    | 3466(9)    | 44.0(6) |
| <b>F5A</b>  | 2060(20)   | 3672(9)    | 3080(12)   | 68.1(9) |
| <b>F6A</b>  | 3200(30)   | 2952(9)    | 3204(9)    | 64.1(9) |
| <b>C16A</b> | 2890(30)   | 3419(11)   | 3467(13)   | 33.6(7) |
| <b>O10A</b> | 1520(20)   | 2955(13)   | 4115(18)   | 23.6(8) |
| <b>O11A</b> | 3410(30)   | 3103(15)   | 4516(19)   | 24.7(7) |
| <b>O9A</b>  | 2160(30)   | 3828(15)   | 4454(18)   | 26.5(8) |
| <b>S2A</b>  | 2442(14)   | 3329(7)    | 4187(10)   | 13.2(3) |

$U_{eq}$  is defined as 1/3 of the trace of the orthogonalized  $U_{II}$  tensor.

**Table S14.** Anisotropic Displacement Parameters ( $\text{\AA}^2 \times 10^3$ ) for  $[\text{Ni}(\text{L})](\text{CF}_3\text{SO}_3)_2 \cdot \text{H}_2\text{O}$ .

| Atom | $U_{11}$  | $U_{22}$  | $U_{33}$  | $U_{23}$  | $U_{13}$  | $U_{12}$  |
|------|-----------|-----------|-----------|-----------|-----------|-----------|
| Ni1  | 7.22(10)  | 11.8(1)   | 7.44(10)  | 0.45(7)   | 1.44(7)   | 0.81(7)   |
| S1   | 13.26(19) | 12.11(18) | 11.60(19) | 0.47(14)  | 2.25(14)  | 2.22(14)  |
| S2   | 12.7(2)   | 13.5(4)   | 13.9(8)   | -3.3(5)   | 3.5(4)    | 1.5(2)    |
| O4   | 11.5(5)   | 16.1(6)   | 11.6(6)   | -1.8(4)   | -0.1(4)   | 3.9(4)    |
| O3   | 9.9(5)    | 13.6(6)   | 14.9(6)   | 0.0(4)    | 3.6(4)    | 0.2(4)    |
| O5   | 8.1(5)    | 16.2(6)   | 9.6(5)    | 0.1(4)    | 2.1(4)    | 1.2(4)    |
| O6   | 21.6(6)   | 14.1(6)   | 15.3(6)   | 2.8(5)    | 3.5(5)    | 5.7(5)    |
| O2   | 12.3(6)   | 22.7(6)   | 9.8(6)    | 1.9(5)    | 4.6(4)    | 2.7(5)    |
| O1   | 24.7(7)   | 12.2(6)   | 17.6(6)   | 0.9(5)    | 14.8(5)   | 0.3(5)    |
| O7   | 22.5(7)   | 19.7(6)   | 12.2(6)   | 2.3(5)    | 4.7(5)    | 3.3(5)    |
| O8   | 14.6(6)   | 26.1(7)   | 33.6(8)   | 1.5(6)    | 3.9(6)    | 3.0(5)    |
| O12  | 17.3(6)   | 14.2(6)   | 24.6(7)   | -2.9(5)   | 4.5(5)    | 0.2(5)    |
| F2   | 59.2(9)   | 13.8(6)   | 29.3(7)   | 0.4(5)    | -5.5(6)   | 9.3(6)    |
| O10  | 18.1(7)   | 19.4(12)  | 35(2)     | -7.7(13)  | 12.6(11)  | -4.1(8)   |
| N2   | 9.6(6)    | 14.4(7)   | 8.4(6)    | -0.2(5)   | 2.5(5)    | 0.1(5)    |
| N1   | 9.3(6)    | 12.9(6)   | 7.0(6)    | 0.7(5)    | 0.1(5)    | 1.1(5)    |
| O11  | 13.0(14)  | 23.4(9)   | 37.4(19)  | -3.6(11)  | 0.7(11)   | 8.0(9)    |
| C13  | 8.5(7)    | 16.0(8)   | 8.7(7)    | -0.5(6)   | 1.7(5)    | 1.5(6)    |
| F1   | 86.0(12)  | 30.9(7)   | 16.7(6)   | -5.4(5)   | 11.6(7)   | 19.7(7)   |
| O9   | 23.6(8)   | 23.5(8)   | 34(2)     | -17.8(15) | 9.3(15)   | 0.1(6)    |
| F3   | 39.4(8)   | 33.7(8)   | 58.3(10)  | -16.1(7)  | -18.9(7)  | -5.2(6)   |
| C8   | 14.7(8)   | 17.0(8)   | 8.7(7)    | -1.9(6)   | 5.6(6)    | 2.4(6)    |
| C12  | 11.0(7)   | 16.6(8)   | 7.9(7)    | 1.3(6)    | 2.8(6)    | 0.7(6)    |
| N4   | 9.5(6)    | 22.0(8)   | 9.8(6)    | -1.1(5)   | 0.7(5)    | 2.0(5)    |
| C14  | 9.6(7)    | 10.9(7)   | 9.3(7)    | 0.4(5)    | 2.0(6)    | -1.0(5)   |
| F4   | 70.9(17)  | 23.8(9)   | 40.4(10)  | 10.8(7)   | 22.1(11)  | -2.5(9)   |
| N3   | 11.3(7)   | 23.1(8)   | 15.0(7)   | -4.6(6)   | -2.3(5)   | 5.3(6)    |
| C10  | 15.1(8)   | 10.9(7)   | 17.5(8)   | 0.4(6)    | 5.0(6)    | -0.4(6)   |
| C3   | 10.9(7)   | 14.6(8)   | 10.7(7)   | -3.6(6)   | 1.9(6)    | 1.5(6)    |
| C7   | 9.1(7)    | 19.5(8)   | 11.2(7)   | 1.0(6)    | 5.5(6)    | 2.7(6)    |
| C4   | 12.8(7)   | 13.4(8)   | 14.3(8)   | -2.3(6)   | 1.9(6)    | 1.8(6)    |
| F5   | 67.0(19)  | 58.8(13)  | 69.2(15)  | 26.0(11)  | -42.7(14) | -1.3(12)  |
| C2   | 12.4(7)   | 19.6(8)   | 6.8(7)    | 1.4(6)    | 2.6(6)    | 3.3(6)    |
| C5   | 19.4(8)   | 15.4(8)   | 14.9(8)   | 3.5(6)    | 6.3(7)    | -0.5(6)   |
| F6   | 139(3)    | 37.8(12)  | 17.6(9)   | -9.1(8)   | 16.3(12)  | -17.1(14) |
| C11  | 10.0(7)   | 16.3(8)   | 11.2(7)   | -0.5(6)   | 1.7(6)    | 3.9(6)    |
| C1   | 13.1(8)   | 18.7(8)   | 10.5(7)   | 4.3(6)    | 5.5(6)    | 2.2(6)    |
| C6   | 15.4(8)   | 15.6(8)   | 15.8(8)   | 1.9(6)    | 6.8(6)    | -4.0(6)   |
| C9   | 14.2(8)   | 13.0(8)   | 16.2(8)   | -2.8(6)   | 3.4(6)    | -0.9(6)   |
| C15  | 34.4(11)  | 16.4(9)   | 18.1(9)   | -1.5(7)   | -3.8(8)   | 7.2(8)    |
| C16  | 56(2)     | 20.9(13)  | 22.6(12)  | 2.9(10)   | -6.1(15)  | -0.2(13)  |
| F4A  | 70.9(17)  | 23.8(9)   | 40.4(10)  | 10.8(7)   | 22.1(11)  | -2.5(9)   |
| F5A  | 67.0(19)  | 58.8(13)  | 69.2(15)  | 26.0(11)  | -42.7(14) | -1.3(12)  |

|             |          |          |          |           |          |           |
|-------------|----------|----------|----------|-----------|----------|-----------|
| <b>F6A</b>  | 139(3)   | 37.8(12) | 17.6(9)  | -9.1(8)   | 16.3(12) | -17.1(14) |
| <b>C16A</b> | 56(2)    | 20.9(13) | 22.6(12) | 2.9(10)   | -6.1(15) | -0.2(13)  |
| <b>O10A</b> | 18.1(7)  | 19.4(12) | 35(2)    | -7.7(13)  | 12.6(11) | -4.1(8)   |
| <b>O11A</b> | 13.0(14) | 23.4(9)  | 37.4(19) | -3.6(11)  | 0.7(11)  | 8.0(9)    |
| <b>O9A</b>  | 23.6(8)  | 23.5(8)  | 34(2)    | -17.8(15) | 9.3(15)  | 0.1(6)    |
| <b>S2A</b>  | 12.7(2)  | 13.5(4)  | 13.9(8)  | -3.3(5)   | 3.5(4)   | 1.5(2)    |

The Anisotropic displacement factor exponent takes the form:  $-2\pi^2[h^2a^*^2U_{11}+2hka^*b^*U_{12}+\dots]$

**Table S15.** Bond Lengths for  $[\text{Ni}(\text{L})](\text{CF}_3\text{SO}_3)_2\cdot\text{H}_2\text{O}$ .

| <b>Atom</b> | <b>Atom</b> | <b>Length/Å</b> | <b>Atom</b> | <b>Atom</b> | <b>Length/Å</b> |
|-------------|-------------|-----------------|-------------|-------------|-----------------|
| <b>Ni1</b>  | O4          | 2.0042(12)      | N2          | C9          | 1.487(2)        |
| <b>Ni1</b>  | O3          | 2.4006(12)      | N1          | C13         | 1.487(2)        |
| <b>Ni1</b>  | O5          | 1.9980(12)      | N1          | C3          | 1.486(2)        |
| <b>Ni1</b>  | O1          | 2.0421(12)      | N1          | C2          | 1.491(2)        |
| <b>Ni1</b>  | N2          | 2.1381(14)      | C13         | C14         | 1.510(2)        |
| <b>Ni1</b>  | N1          | 2.1653(14)      | F1          | C15         | 1.329(2)        |
| <b>S1</b>   | O6          | 1.4478(13)      | F3          | C15         | 1.329(3)        |
| <b>S1</b>   | O7          | 1.4456(13)      | C8          | C7          | 1.507(2)        |
| <b>S1</b>   | O8          | 1.4379(14)      | C12         | N3          | 1.317(2)        |
| <b>S1</b>   | C15         | 1.824(2)        | C12         | C11         | 1.516(2)        |
| <b>S2</b>   | O10         | 1.446(4)        | N4          | C14         | 1.313(2)        |
| <b>S2</b>   | O11         | 1.449(5)        | F4          | C16         | 1.332(4)        |
| <b>S2</b>   | O9          | 1.446(5)        | C10         | C9          | 1.520(2)        |
| <b>S2</b>   | C16         | 1.836(6)        | C3          | C4          | 1.509(2)        |
| <b>O4</b>   | C12         | 1.252(2)        | F5          | C16         | 1.337(4)        |
| <b>O3</b>   | C7          | 1.428(2)        | C2          | C1          | 1.513(2)        |
| <b>O3</b>   | C6          | 1.427(2)        | C5          | C6          | 1.501(2)        |
| <b>O5</b>   | C14         | 1.2602(19)      | F6          | C16         | 1.337(4)        |
| <b>O2</b>   | C4          | 1.425(2)        | F4A         | C16A        | 1.28(3)         |
| <b>O2</b>   | C5          | 1.418(2)        | F5A         | C16A        | 1.34(3)         |
| <b>O1</b>   | C10         | 1.427(2)        | F6A         | C16A        | 1.30(3)         |
| <b>O1</b>   | C1          | 1.433(2)        | C16A        | S2A         | 1.65(4)         |
| <b>F2</b>   | C15         | 1.335(2)        | O10A        | S2A         | 1.39(3)         |
| <b>N2</b>   | C8          | 1.483(2)        | O11A        | S2A         | 1.37(4)         |
| <b>N2</b>   | C11         | 1.483(2)        | O9A         | S2A         | 1.36(4)         |



**Table S16.** Bond Angles for [Ni(L)](CF<sub>3</sub>SO<sub>3</sub>)<sub>2</sub>•H<sub>2</sub>O.

| Atom | Atom | Atom | Angle/°    | Atom | Atom | Atom | Angle/°    |
|------|------|------|------------|------|------|------|------------|
| O4   | Ni1  | O3   | 88.47(5)   | C3   | N1   | C13  | 110.42(12) |
| O4   | Ni1  | O1   | 96.69(5)   | C3   | N1   | C2   | 109.14(13) |
| O4   | Ni1  | N2   | 82.77(5)   | C2   | N1   | Ni1  | 103.23(9)  |
| O4   | Ni1  | N1   | 102.01(5)  | N1   | C13  | C14  | 111.13(13) |
| O5   | Ni1  | O4   | 167.87(5)  | N2   | C8   | C7   | 110.72(13) |
| O5   | Ni1  | O3   | 80.53(4)   | O4   | C12  | N3   | 122.63(16) |
| O5   | Ni1  | O1   | 95.40(5)   | O4   | C12  | C11  | 120.37(15) |
| O5   | Ni1  | N2   | 99.13(5)   | N3   | C12  | C11  | 116.99(15) |
| O5   | Ni1  | N1   | 81.87(5)   | O5   | C14  | C13  | 120.40(14) |
| O1   | Ni1  | O3   | 149.94(5)  | O5   | C14  | N4   | 121.61(15) |
| O1   | Ni1  | N2   | 76.34(5)   | N4   | C14  | C13  | 117.98(14) |
| O1   | Ni1  | N1   | 76.29(5)   | O1   | C10  | C9   | 105.31(13) |
| N2   | Ni1  | O3   | 74.97(5)   | N1   | C3   | C4   | 110.52(13) |
| N2   | Ni1  | N1   | 152.58(5)  | O3   | C7   | C8   | 106.44(13) |
| N1   | Ni1  | O3   | 131.63(5)  | O2   | C4   | C3   | 105.42(13) |
| O6   | S1   | C15  | 103.42(8)  | N1   | C2   | C1   | 110.76(13) |
| O7   | S1   | O6   | 113.91(8)  | O2   | C5   | C6   | 105.58(14) |
| O7   | S1   | C15  | 102.27(9)  | N2   | C11  | C12  | 111.05(13) |
| O8   | S1   | O6   | 115.55(8)  | O1   | C1   | C2   | 105.40(13) |
| O8   | S1   | O7   | 115.23(8)  | O3   | C6   | C5   | 105.82(13) |
| O8   | S1   | C15  | 104.08(9)  | N2   | C9   | C10  | 110.77(13) |
| O10  | S2   | O11  | 115.1(3)   | F2   | C15  | S1   | 110.93(13) |
| O10  | S2   | O9   | 115.6(2)   | F1   | C15  | S1   | 111.70(15) |
| O10  | S2   | C16  | 103.4(2)   | F1   | C15  | F2   | 107.26(16) |
| O11  | S2   | C16  | 101.4(5)   | F3   | C15  | S1   | 111.26(14) |
| O9   | S2   | O11  | 115.3(3)   | F3   | C15  | F2   | 107.61(18) |
| O9   | S2   | C16  | 103.25(19) | F3   | C15  | F1   | 107.88(17) |
| C12  | O4   | Ni1  | 115.00(11) | F4   | C16  | S2   | 111.4(2)   |
| C7   | O3   | Ni1  | 109.31(9)  | F4   | C16  | F5   | 107.1(2)   |
| C6   | O3   | Ni1  | 121.29(10) | F4   | C16  | F6   | 107.8(3)   |
| C6   | O3   | C7   | 112.77(12) | F5   | C16  | S2   | 111.6(3)   |
| C14  | O5   | Ni1  | 116.10(10) | F5   | C16  | F6   | 108.1(3)   |
| C5   | O2   | C4   | 114.96(13) | F6   | C16  | S2   | 110.6(2)   |
| C10  | O1   | Ni1  | 121.20(10) | F4A  | C16A | F5A  | 102(2)     |
| C10  | O1   | C1   | 118.13(13) | F4A  | C16A | F6A  | 109(3)     |
| C1   | O1   | Ni1  | 120.67(10) | F4A  | C16A | S2A  | 113(2)     |
| C8   | N2   | Ni1  | 112.70(10) | F5A  | C16A | S2A  | 110(2)     |
| C8   | N2   | C9   | 109.78(13) | F6A  | C16A | F5A  | 110(2)     |
| C11  | N2   | Ni1  | 106.11(10) | F6A  | C16A | S2A  | 113(2)     |
| C11  | N2   | C8   | 111.13(13) | O10A | S2A  | C16A | 106.9(17)  |
| C11  | N2   | C9   | 111.82(13) | O11A | S2A  | C16A | 101(2)     |
| C9   | N2   | Ni1  | 105.13(10) | O11A | S2A  | O10A | 113(2)     |
| C13  | N1   | Ni1  | 106.09(9)  | O9A  | S2A  | C16A | 111.6(18)  |

|            |    |     |            |     |     |      |        |
|------------|----|-----|------------|-----|-----|------|--------|
| <b>C13</b> | N1 | C2  | 111.86(13) | O9A | S2A | O10A | 113(2) |
| <b>C3</b>  | N1 | Ni1 | 115.93(10) | O9A | S2A | O11A | 111(2) |

**Table S17.** Torsion Angles for [Ni(L)](CF<sub>3</sub>SO<sub>3</sub>)<sub>2</sub>•H<sub>2</sub>O.

| <b>A</b>   | <b>B</b> | <b>C</b> | <b>D</b> | <b>Angle/°</b> | <b>A</b> | <b>B</b> | <b>C</b> | <b>D</b> | <b>Angle/°</b> |
|------------|----------|----------|----------|----------------|----------|----------|----------|----------|----------------|
| <b>Ni1</b> | O4       | C12      | N3       | 172.09(13)     | O11      | S2       | C16      | F4       | -58.9(3)       |
| <b>Ni1</b> | O4       | C12      | C11      | -9.21(19)      | O11      | S2       | C16      | F5       | -178.6(3)      |
| <b>Ni1</b> | O3       | C7       | C8       | 39.97(14)      | O11      | S2       | C16      | F6       | 61.0(3)        |
| <b>Ni1</b> | O3       | C6       | C5       | -47.85(17)     | C13      | N1       | C3       | C4       | -72.12(16)     |
| <b>Ni1</b> | O5       | C14      | C13      | -4.38(19)      | C13      | N1       | C2       | C1       | 60.83(17)      |
| <b>Ni1</b> | O5       | C14      | N4       | 176.53(12)     | O9       | S2       | C16      | F4       | 60.8(3)        |
| <b>Ni1</b> | O1       | C10      | C9       | -6.58(18)      | O9       | S2       | C16      | F5       | -58.9(3)       |
| <b>Ni1</b> | O1       | C1       | C2       | -6.26(17)      | O9       | S2       | C16      | F6       | -179.3(3)      |
| <b>Ni1</b> | N2       | C8       | C7       | 45.75(16)      | C8       | N2       | C11      | C12      | 100.67(15)     |
| <b>Ni1</b> | N2       | C11      | C12      | -22.17(15)     | C8       | N2       | C9       | C10      | -171.99(13)    |
| <b>Ni1</b> | N2       | C9       | C10      | -50.52(15)     | N3       | C12      | C11      | N2       | -158.65(15)    |
| <b>Ni1</b> | N1       | C13      | C14      | -21.81(15)     | C10      | O1       | C1       | C2       | 173.99(14)     |
| <b>Ni1</b> | N1       | C3       | C4       | 48.55(16)      | C3       | N1       | C13      | C14      | 104.56(15)     |
| <b>Ni1</b> | N1       | C2       | C1       | -52.82(14)     | C3       | N1       | C2       | C1       | -176.68(13)    |
| <b>O4</b>  | C12      | C11      | N2       | 22.6(2)        | C7       | O3       | C6       | C5       | 179.71(13)     |
| <b>O6</b>  | S1       | C15      | F2       | -174.49(15)    | C4       | O2       | C5       | C6       | -170.34(14)    |
| <b>O6</b>  | S1       | C15      | F1       | 65.90(16)      | C2       | N1       | C13      | C14      | -133.67(14)    |
| <b>O6</b>  | S1       | C15      | F3       | -54.72(16)     | C2       | N1       | C3       | C4       | 164.53(13)     |
| <b>O2</b>  | C5       | C6       | O3       | 58.34(17)      | C5       | O2       | C4       | C3       | 171.90(14)     |
| <b>O1</b>  | C10      | C9       | N2       | 37.84(18)      | C11      | N2       | C8       | C7       | -73.21(17)     |
| <b>O7</b>  | S1       | C15      | F2       | -55.91(17)     | C11      | N2       | C9       | C10      | 64.19(17)      |
| <b>O7</b>  | S1       | C15      | F1       | -175.53(14)    | C1       | O1       | C10      | C9       | 173.16(14)     |
| <b>O7</b>  | S1       | C15      | F3       | 63.85(16)      | C6       | O3       | C7       | C8       | 178.04(13)     |
| <b>O8</b>  | S1       | C15      | F2       | 64.37(17)      | C9       | N2       | C8       | C7       | 162.56(13)     |
| <b>O8</b>  | S1       | C15      | F1       | -55.24(16)     | C9       | N2       | C11      | C12      | -136.27(14)    |
| <b>O8</b>  | S1       | C15      | F3       | -175.86(14)    | F4A      | C16A     | S2A      | O10A     | 178(2)         |
| <b>O10</b> | S2       | C16      | F4       | -178.4(2)      | F4A      | C16A     | S2A      | O11A     | -64(3)         |
| <b>O10</b> | S2       | C16      | F5       | 61.9(3)        | F4A      | C16A     | S2A      | O9A      | 53(3)          |
| <b>O10</b> | S2       | C16      | F6       | -58.5(3)       | F5A      | C16A     | S2A      | O10A     | 65(3)          |
| <b>N2</b>  | C8       | C7       | O3       | -57.12(17)     | F5A      | C16A     | S2A      | O11A     | -176(2)        |
| <b>N1</b>  | C13      | C14      | O5       | 19.2(2)        | F5A      | C16A     | S2A      | O9A      | -59(3)         |
| <b>N1</b>  | C13      | C14      | N4       | -161.72(14)    | F6A      | C16A     | S2A      | O10A     | -58(3)         |
| <b>N1</b>  | C3       | C4       | O2       | -61.99(17)     | F6A      | C16A     | S2A      | O11A     | 60(3)          |
| <b>N1</b>  | C2       | C1       | O1       | 39.87(17)      | F6A      | C16A     | S2A      | O9A      | 178(3)         |

**Table S18.** Hydrogen Atom Coordinates ( $\text{\AA}\times 10^4$ ) and Isotropic Displacement Parameters ( $\text{\AA}^2\times 10^3$ ) for  $[\text{Ni}(\text{L})](\text{CF}_3\text{SO}_3)_2\cdot\text{H}_2\text{O}$ .

| Atom | <i>x</i> | <i>y</i> | <i>z</i> | U(eq) |
|------|----------|----------|----------|-------|
| H13A | -963     | 7020     | 4222     | 13    |
| H13B | -908     | 6364     | 4325     | 13    |
| H8A  | 2552     | 5762     | 2657     | 16    |
| H8B  | 3737     | 5474     | 2890     | 16    |
| H4A  | -1178    | 6649     | 2638     | 17    |
| H4B  | -1885    | 6806     | 3172     | 17    |
| H3A  | 5337     | 6315     | 5091     | 20    |
| H3B  | 5591     | 5764     | 4791     | 20    |
| H10A | 578      | 4953     | 4112     | 17    |
| H10B | 1809     | 4909     | 4501     | 17    |
| H3C  | 1493     | 7369     | 5074     | 14    |
| H3D  | 166      | 7497     | 4923     | 14    |
| H7A  | 4473     | 6339     | 3293     | 16    |
| H7B  | 4033     | 6414     | 2558     | 16    |
| H4C  | 473      | 7666     | 3827     | 16    |
| H4D  | 1217     | 8086     | 4285     | 16    |
| H2A  | 107      | 6502     | 5418     | 15    |
| H2B  | 1452     | 6450     | 5398     | 15    |
| H5A  | 2714     | 8061     | 3414     | 20    |
| H5B  | 1809     | 7656     | 3036     | 20    |
| H11A | 4415     | 5404     | 3902     | 15    |
| H11B | 3528     | 5215     | 4385     | 15    |
| H1A  | 887      | 5537     | 5335     | 17    |
| H1B  | -237     | 5678     | 4877     | 17    |
| H6A  | 3679     | 7415     | 2776     | 18    |
| H6B  | 4081     | 7324     | 3514     | 18    |
| H9A  | 2266     | 4847     | 3467     | 17    |
| H9B  | 1313     | 5285     | 3218     | 17    |
| H12A | 3420(30) | 2861(10) | 6153(12) | 46(8) |
| H12B | 3490(20) | 3425(8)  | 6274(12) | 30(7) |

**Table S19.** Atomic Occupancy for [Ni(L)](CF<sub>3</sub>SO<sub>3</sub>)<sub>2</sub>•H<sub>2</sub>O.

| <b>Atom</b> | <b>Occupancy</b> | <b>Atom</b> | <b>Occupancy</b> | <b>Atom</b> | <b>Occupancy</b> |
|-------------|------------------|-------------|------------------|-------------|------------------|
| <b>S2</b>   | 0.87(3)          | <b>O10</b>  | 0.87(3)          | <b>O11</b>  | 0.87(3)          |
| <b>O9</b>   | 0.87(3)          | <b>F4</b>   | 0.889(5)         | <b>F5</b>   | 0.889(5)         |
| <b>F6</b>   | 0.889(5)         | <b>C16</b>  | 0.889(5)         | <b>F4A</b>  | 0.111(5)         |
| <b>F5A</b>  | 0.111(5)         | <b>F6A</b>  | 0.111(5)         | <b>C16A</b> | 0.111(5)         |
| <b>O10A</b> | 0.13(3)          | <b>O11A</b> | 0.13(3)          | <b>O9A</b>  | 0.13(3)          |

## References

- (1) Iskenderian, H. P. *Phys. Rev.* **1937**, *51*, 1092.
- (2) Evans, D. F. *J. Chem. Soc.* **1959**, 2003.
- (3) Schubert, E. M. *J. Chem. Educ.* **1992**, *69*, 62.
